# Supplementary material for: Effects of ozone-vegetation interactions on meteorology and air quality in China using a two-way coupled land-atmosphere model
Source: Copernicus journal article supplement (doi:10.5194/acp-2021-165), 2021-03-18
Supplement: Supplementary file 1 [file acp-2021-165-supplement-version4.pdf]

Supplement of

# **Effects of ozone-vegetation interactions on meteorology and air quality in China using a two-way coupled land-atmosphere model**

Jiachen Zhu et al.

*Correspondence to:* Steve H.L. Yim ([yimsteve@gmail.com](mailto:yimsteve@gmail.com)) & Amos P.K. Tai ([amostai@cuhk.edu.hk](mailto:amostai@cuhk.edu.hk))

**Table S1.** Physics options used in model simulations

| Physics                  | Scheme                 |
|--------------------------|------------------------|
| Cloud microphysics       | Morrison double-moment |
| Cumulus parameterization | Grell-3D               |
| Longwave radiation       | RRTMG                  |
| Shortwave radiation      | Goddard                |
| Land-surface physics     | Noah-MP                |
| Planetary boundary layer | Mellor-Yamada-Janjic   |

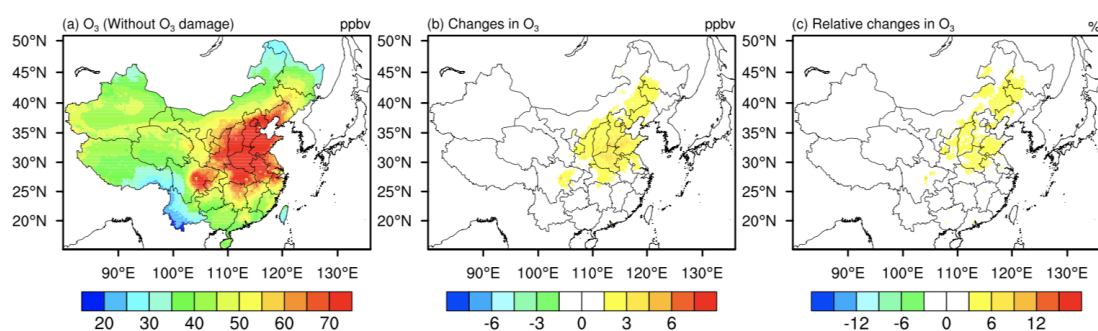

**Figure S1.** Spatial distribution of 2014–2017 JJA daytime mean (a) surface  $O_3$  concentration, and (b) absolute changes and (c) relative changes in  $O_3$ .

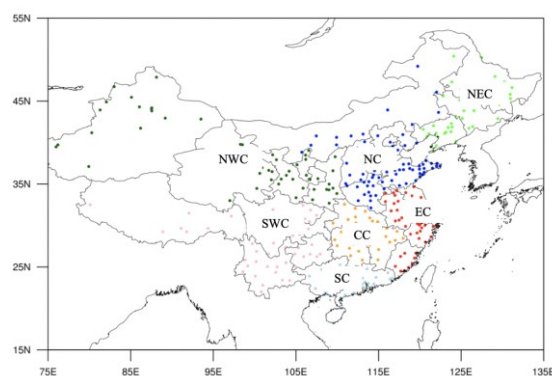

**Figure S2.** The location air quality monitoring sites (colored dots) and the seven major geographic regions of China. The region covered by light green dots is northeast China (NEC), blue dots cover north China (NC), and dark green dots cover northwest China (NWC). Red dots cover east China (EC), oranges cover central China (CC), pinks dots cover southwest China (SWC), and light blue dots cover south China (SC).

**Table S2.** Same as Table 3, but for the evaluation of the original model simulations.

|                                                           | <b>Year</b> | <b>Mean_obs</b> | <b>SD_obs</b> | <b>Mean_simu</b> | <b>SD_simu</b> | <b>IOA</b> | <b>CORR</b> | <b>MB</b> |
|-----------------------------------------------------------|-------------|-----------------|---------------|------------------|----------------|------------|-------------|-----------|
| <b><math>T_{2m}</math></b><br><b>(°C)</b>                 | 2014        | 25.41           | 2.61          | 24.86            | 2.29           | 0.86       | 0.87        | -0.54     |
|                                                           | 2015        | 25.41           | 2.56          | 24.49            | 2.23           | 0.86       | 0.89        | -0.91     |
|                                                           | 2016        | 26.35           | 2.82          | 25.25            | 2.65           | 0.84       | 0.83        | -1.10     |
|                                                           | 2017        | 26.29           | 3.17          | 25.10            | 3.17           | 0.81       | 0.78        | -1.18     |
| <b><math>RH_{2m}</math></b><br><b>(%)</b>                 | 2014        | 74.77           | 10.22         | 80.71            | 8.44           | 0.67       | 0.71        | 5.94      |
|                                                           | 2015        | 73.34           | 10.75         | 82.16            | 8.16           | 0.65       | 0.74        | 8.82      |
|                                                           | 2016        | 74.14           | 10.81         | 83.46            | 9.20           | 0.67       | 0.73        | 9.32      |
|                                                           | 2017        | 73.24           | 11.65         | 81.56            | 9.18           | 0.67       | 0.69        | 8.32      |
| <b><math>WS_{10m}</math></b><br><b>(m s<sup>-1</sup>)</b> | 2014        | 1.84            | 0.66          | 2.21             | 1.15           | 0.54       | 0.40        | 0.36      |
|                                                           | 2015        | 2.00            | 0.74          | 2.45             | 1.34           | 0.55       | 0.44        | 0.46      |
|                                                           | 2016        | 1.99            | 0.70          | 2.48             | 1.34           | 0.54       | 0.44        | 0.48      |
|                                                           | 2017        | 2.02            | 0.72          | 2.50             | 1.41           | 0.53       | 0.46        | 0.49      |

**Table S3.** Same as Table 4, but for the evaluation of the original model simulations.

|                                                                     | <b>Year</b> | <b>Mean_obs</b> | <b>SD_obs</b> | <b>Mean_simu</b> | <b>SD_simu</b> | <b>IOA</b> | <b>CORR</b> | <b>MB</b> |
|---------------------------------------------------------------------|-------------|-----------------|---------------|------------------|----------------|------------|-------------|-----------|
| <b>O<sub>3</sub></b><br><b>(ppb)</b>                                | 2014        | 29.79           | 9.95          | 50.13            | 17.9           | 0.48       | 0.57        | 20.75     |
|                                                                     | 2015        | 32.04           | 10.16         | 47.82            | 17.73          | 0.55       | 0.55        | 15.80     |
|                                                                     | 2016        | 33.28           | 10.59         | 47.15            | 17.53          | 0.57       | 0.56        | 13.83     |
|                                                                     | 2017        | 35.74           | 11.71         | 48.24            | 18.88          | 0.63       | 0.66        | 12.55     |
| <b>PM<sub>2.5</sub></b><br><b>(<math>\mu\text{g m}^{-3}</math>)</b> | 2014        | 46.30           | 21.52         | 64.42            | 27.59          | 0.51       | 0.33        | 19.84     |
|                                                                     | 2015        | 38.52           | 17.30         | 58.33            | 25.67          | 0.55       | 0.43        | 19.47     |
|                                                                     | 2016        | 31.86           | 13.96         | 57.98            | 26.06          | 0.47       | 0.40        | 25.82     |
|                                                                     | 2017        | 28.82           | 12.23         | 57.17            | 26.00          | 0.40       | 0.30        | 28.46     |
| <b>PM<sub>10</sub></b><br><b>(<math>\mu\text{g m}^{-3}</math>)</b>  | 2014        | 80.79           | 31.62         | 72.99            | 29.11          | 0.47       | 0.22        | -6.17     |
|                                                                     | 2015        | 72.03           | 29.74         | 66.75            | 27.14          | 0.50       | 0.28        | -6.00     |
|                                                                     | 2016        | 59.68           | 22.21         | 66.38            | 27.67          | 0.49       | 0.24        | 6.01      |
|                                                                     | 2017        | 57.83           | 22.18         | 65.71            | 27.56          | 0.41       | 0.14        | 7.85      |
| <b>SO<sub>2</sub></b><br><b>(ppb)</b>                               | 2014        | 6.11            | 2.36          | 8.37             | 3.16           | 0.48       | 0.41        | 2.33      |
|                                                                     | 2015        | 4.78            | 1.89          | 8.32             | 3.19           | 0.45       | 0.44        | 3.56      |
|                                                                     | 2016        | 4.17            | 1.57          | 7.97             | 3.13           | 0.41       | 0.35        | 3.80      |
|                                                                     | 2017        | 3.83            | 1.33          | 8.56             | 3.49           | 0.36       | 0.41        | 4.76      |
| <b>NO<sub>2</sub></b><br><b>(ppb)</b>                               | 2014        | 17.20           | 4.51          | 17.56            | 4.69           | 0.41       | 0.26        | 0.41      |
|                                                                     | 2015        | 16.01           | 4.47          | 17.61            | 5.00           | 0.43       | 0.32        | 1.67      |
|                                                                     | 2016        | 15.29           | 4.29          | 17.58            | 5.13           | 0.43       | 0.32        | 2.30      |
|                                                                     | 2017        | 15.83           | 4.37          | 18.09            | 5.15           | 0.43       | 0.32        | 2.27      |
| <b>CO</b><br><b>(ppm)</b>                                           | 2014        | 0.76            | 0.19          | 0.44             | 0.11           | 0.48       | 0.42        | -0.31     |
|                                                                     | 2015        | 0.67            | 0.15          | 0.45             | 0.11           | 0.49       | 0.42        | -0.21     |
|                                                                     | 2016        | 0.65            | 0.14          | 0.45             | 0.11           | 0.50       | 0.45        | -0.20     |
|                                                                     | 2017        | 0.64            | 0.12          | 0.46             | 0.11           | 0.47       | 0.38        | -0.18     |

**Table S4.** The location information of the 26 major cities used for meteorology evaluation. NE is northeast China, NC is north China, CC is central China, EC is east China, SC is south China, SW indicates southwest China, and NW is northwest China.

| City      | Lon    | Lat   | Region | City      | Lon    | Lat   | Region |
|-----------|--------|-------|--------|-----------|--------|-------|--------|
| Haerbin   | 126.34 | 45.56 | NEC    | Hefei     | 117.18 | 31.47 | EC     |
| Changchun | 125.13 | 43.54 | NEC    | Shanghai  | 121.27 | 31.24 | EC     |
| Shenyang  | 123.31 | 41.44 | NEC    | Hangzhou  | 120.10 | 30.14 | EC     |
| Huhehaote | 111.34 | 40.51 | NC     | Xiamen    | 118.04 | 24.29 | EC     |
| Beijing   | 116.13 | 39.99 | NC     | Shenzhen  | 114.00 | 23.32 | SC     |
| Tianjin   | 117.21 | 39.17 | NC     | Guangzhou | 113.29 | 23.13 | SC     |
| Taiyuan   | 112.35 | 37.37 | NC     | Nanning   | 108.13 | 22.38 | SC     |
| Zhengzhou | 113.39 | 34.43 | NC     | Haikou    | 110.15 | 20.00 | SC     |
| Jinan     | 117.00 | 36.36 | NC     | Chongqing | 107.22 | 29.53 | SWC    |
| Wuhan     | 114.03 | 30.36 | CC     | Guiyang   | 106.44 | 26.35 | SWC    |
| Changsha  | 112.55 | 28.13 | CC     | Kunming   | 102.39 | 25.00 | SWC    |
| Nanchang  | 115.55 | 28.36 | CC     | Yinchuan  | 106.12 | 38.28 | NWC    |
| Nanjing   | 118.54 | 31.56 | EC     | Xining    | 101.45 | 36.44 | NWC    |

**Table S5.** Evaluation results of surface temperature at 2-m (°C) in 26 major cities from the implemented model. NE is northeast China, NC is north China, CC is central China, EC is east China, SC is south China, SW indicates southwest China, and NW is northwest China. Mean\_obs (Mean\_simu) is the mean value of observations (model simulations); SD\_obs (SD\_simu) is the standard deviation of the observations (model simulations); IOA is the index of agreement; CORR is the correlation coefficient; MB is the mean bias.

| City      | Region | Mean_obs | SD_obs | Mean_simu | SD_simu | IOA  | CORR | MB    |
|-----------|--------|----------|--------|-----------|---------|------|------|-------|
| Haerbin   | NEC    | 22.58    | 3.16   | 22.19     | 3.21    | 0.94 | 0.91 | -0.39 |
| Changchun | NEC    | 22.62    | 3.22   | 22.05     | 3.00    | 0.94 | 0.93 | -0.57 |
| Shenyang  | NEC    | 23.84    | 2.79   | 23.95     | 2.84    | 0.94 | 0.89 | 0.11  |
| Huhehaote | NC     | 21.26    | 2.88   | 23.52     | 3.04    | 0.81 | 0.88 | 2.27  |
| Beijing   | NC     | 26.54    | 2.59   | 28.25     | 2.80    | 0.83 | 0.86 | 1.71  |
| Tianjin   | NC     | 26.54    | 2.52   | 27.41     | 2.73    | 0.90 | 0.87 | 0.87  |
| Taiyuan   | NC     | 21.25    | 2.88   | 23.52     | 3.04    | 0.81 | 0.88 | 2.27  |
| Zhengzhou | NC     | 27.57    | 2.89   | 26.66     | 2.79    | 0.92 | 0.91 | -1.01 |
| Jinan     | NC     | 26.49    | 2.81   | 25.65     | 2.65    | 0.90 | 0.87 | -0.84 |
| Wuhan     | CC     | 27.30    | 2.98   | 26.53     | 2.55    | 0.93 | 0.90 | -0.76 |
| Changsha  | CC     | 27.25    | 3.08   | 26.65     | 2.87    | 0.92 | 0.89 | -0.60 |
| Nanchang  | CC     | 28.30    | 3.08   | 27.42     | 2.82    | 0.9  | 0.85 | -0.88 |
| Nanjing   | EC     | 26.76    | 3.29   | 26.32     | 3.00    | 0.96 | 0.93 | -0.44 |
| Hefei     | EC     | 27.14    | 3.20   | 26.38     | 2.86    | 0.94 | 0.93 | -0.76 |
| Shanghai  | EC     | 27.09    | 3.32   | 25.93     | 2.82    | 0.93 | 0.94 | -1.16 |
| Hangzhou  | EC     | 27.60    | 3.38   | 26.26     | 3.00    | 0.91 | 0.91 | -1.35 |
| Xiamen    | EC     | 28.04    | 1.75   | 27.40     | 1.22    | 0.77 | 0.72 | -0.63 |
| Shenzhen  | SC     | 29.03    | 1.39   | 28.65     | 0.86    | 0.65 | 0.53 | -0.39 |
| Guangzhou | SC     | 28.29    | 1.55   | 28.85     | 1.55    | 0.75 | 0.65 | 0.56  |
| Nanning   | SC     | 28.14    | 1.63   | 27.67     | 1.74    | 0.82 | 0.72 | -0.47 |
| Haikou    | SC     | 28.93    | 1.38   | 29.25     | 1.06    | 0.77 | 0.66 | 0.31  |
| Chongqing | SWC    | 26.69    | 3.24   | 24.84     | 2.79    | 0.83 | 0.87 | -1.84 |
| Guiyang   | SWC    | 22.43    | 2.15   | 21.37     | 2.00    | 0.82 | 0.79 | -1.06 |
| Kunming   | SWC    | 20.49    | 1.57   | 18.63     | 1.64    | 0.65 | 0.75 | -1.86 |
| Yinchuan  | NWC    | 23.49    | 2.97   | 24.64     | 3.15    | 0.93 | 0.93 | 1.15  |

|        |     |      |      |       |      |      |      |       |
|--------|-----|------|------|-------|------|------|------|-------|
| Xining | NWC | 16.9 | 2.77 | 12.46 | 2.87 | 0.60 | 0.85 | -4.44 |
|--------|-----|------|------|-------|------|------|------|-------|

**Table S6.** Same as Table S5 but for relative humidity at 2-m (%).

| City      | Region | Mean_obs | SD_obs | Mean_simu | SD_simu | IOA  | CORR | MB     |
|-----------|--------|----------|--------|-----------|---------|------|------|--------|
| Haerbin   | NEC    | 72.25    | 10.52  | 70.32     | 15.31   | 0.86 | 0.81 | -1.78  |
| Changchun | NEC    | 69.78    | 12.27  | 74.89     | 13.57   | 0.82 | 0.78 | 5.10   |
| Shenyang  | NEC    | 71.26    | 11.68  | 70.73     | 13.02   | 0.86 | 0.77 | -0.53  |
| Huhehaote | NC     | 50.52    | 14.24  | 49.89     | 13.02   | 0.79 | 0.70 | -0.63  |
| Beijing   | NC     | 62.17    | 14.69  | 48.05     | 13.58   | 0.71 | 0.77 | -14.12 |
| Tianjin   | NC     | 66.37    | 13.25  | 55.75     | 12.44   | 0.75 | 0.77 | -10.62 |
| Taiyuan   | NC     | 66.72    | 12.98  | 57.38     | 15.03   | 0.76 | 0.73 | -9.3   |
| Zhengzhou | NC     | 67.24    | 14.00  | 63.76     | 15.27   | 0.83 | 0.72 | -3.48  |
| Jinan     | NC     | 66.49    | 14.48  | 67.22     | 15.19   | 0.88 | 0.79 | 0.74   |
| Wuhan     | CC     | 81.20    | 8.84   | 85.88     | 9.27    | 0.76 | 0.68 | 4.68   |
| Changsha  | CC     | 79.40    | 10.74  | 90.57     | 7.12    | 0.64 | 0.67 | 11.17  |
| Nanchang  | CC     | 77.08    | 10.76  | 88.42     | 9.43    | 0.70 | 0.79 | 11.34  |
| Nanjing   | EC     | 78.51    | 10.83  | 87.07     | 9.82    | 0.77 | 0.83 | 8.56   |
| Hefei     | EC     | 79.55    | 9.68   | 85.79     | 11.06   | 0.82 | 0.82 | 6.26   |
| Shanghai  | EC     | 76.98    | 9.55   | 89.14     | 8.31    | 0.63 | 0.73 | 12.16  |
| Hangzhou  | EC     | 76.52    | 10.88  | 90.33     | 7.49    | 0.63 | 0.85 | 13.81  |
| Xiamen    | EC     | 83.09    | 9.00   | 91.65     | 4.89    | 0.62 | 0.72 | 8.56   |
| Shenzhen  | SC     | 79.82    | 7.54   | 92.03     | 3.77    | 0.50 | 0.62 | 12.21  |
| Guangzhou | SC     | 82.05    | 6.78   | 87.39     | 7.48    | 0.68 | 0.61 | 5.34   |
| Nanning   | SC     | 83.01    | 5.89   | 90.25     | 6.37    | 0.62 | 0.63 | 7.23   |
| Haikou    | SC     | 80.17    | 5.94   | 83.95     | 5.03    | 0.66 | 0.55 | 3.78   |
| Chongqing | SWC    | 76.28    | 11.00  | 88.16     | 7.34    | 0.63 | 0.70 | 11.86  |
| Guiyang   | SWC    | 82.46    | 8.64   | 95.04     | 3.84    | 0.52 | 0.65 | 12.57  |
| Kunming   | SWC    | 78.03    | 7.70   | 93.82     | 4.21    | 0.42 | 0.57 | 15.79  |
| Yinchuan  | NWC    | 52.63    | 14.01  | 42.99     | 13.70   | 0.77 | 0.76 | -9.65  |
| Xining    | NWC    | 63.22    | 12.66  | 73.97     | 14.49   | 0.72 | 0.75 | 10.75  |

**Table S7.** Same as Table S5 but for wind speed at 10-m ( $\text{m s}^{-1}$ ).

| City      | Region | Mean_obs | SD_obs | Mean_simu | SD_simu | IOA  | CORR | MB    |
|-----------|--------|----------|--------|-----------|---------|------|------|-------|
| Haerbin   | NEC    | 2.47     | 1.16   | 3.08      | 1.78    | 0.75 | 0.68 | 0.62  |
| Changchun | NEC    | 2.30     | 0.89   | 3.16      | 1.91    | 0.61 | 0.64 | 0.86  |
| Shenyang  | NEC    | 1.88     | 0.74   | 3.00      | 1.72    | 0.50 | 0.53 | 1.12  |
| Huhehaote | NC     | 2.76     | 0.88   | 2.46      | 1.30    | 0.57 | 0.41 | -0.30 |
| Beijing   | NC     | 1.81     | 0.59   | 2.20      | 1.35    | 0.52 | 0.43 | 0.38  |
| Tianjin   | NC     | 2.09     | 0.70   | 2.59      | 1.27    | 0.58 | 0.47 | 0.49  |
| Taiyuan   | NC     | 2.06     | 0.81   | 2.12      | 1.12    | 0.66 | 0.46 | 0.07  |
| Zhengzhou | NC     | 1.75     | 0.54   | 2.46      | 1.26    | 0.48 | 0.48 | 0.71  |
| Jinan     | NC     | 1.89     | 0.81   | 2.84      | 1.44    | 0.61 | 0.60 | 0.95  |
| Wuhan     | CC     | 1.79     | 0.75   | 2.02      | 1.25    | 0.63 | 0.50 | 0.23  |
| Changsha  | CC     | 2.15     | 0.93   | 2.58      | 1.47    | 0.65 | 0.55 | 0.45  |
| Nanchang  | CC     | 2.23     | 0.76   | 2.55      | 1.50    | 0.55 | 0.48 | 0.31  |
| Nanjing   | EC     | 2.31     | 0.96   | 2.68      | 1.41    | 0.72 | 0.62 | 0.36  |
| Hefei     | EC     | 1.91     | 0.66   | 2.67      | 1.40    | 0.61 | 0.63 | 0.76  |
| Shanghai  | EC     | 2.36     | 0.86   | 3.32      | 1.84    | 0.57 | 0.54 | 0.97  |
| Hangzhou  | EC     | 2.04     | 0.61   | 2.45      | 1.46    | 0.53 | 0.47 | 0.41  |
| Xiamen    | EC     | 2.29     | 0.73   | 3.12      | 1.58    | 0.54 | 0.49 | 0.83  |
| Shenzhen  | SC     | 1.93     | 0.91   | 3.27      | 1.74    | 0.47 | 0.39 | 1.35  |
| Guangzhou | SC     | 1.92     | 0.81   | 2.38      | 1.23    | 0.59 | 0.44 | 0.45  |
| Nanning   | SC     | 2.11     | 0.72   | 2.75      | 1.48    | 0.56 | 0.51 | 0.64  |
| Haikou    | SC     | 2.11     | 0.58   | 2.85      | 1.57    | 0.45 | 0.39 | 0.74  |
| Chongqing | SWC    | 1.92     | 0.68   | 2.09      | 1.24    | 0.55 | 0.44 | 0.17  |
| Guiyang   | SWC    | 2.44     | 0.81   | 3.18      | 1.71    | 0.59 | 0.57 | 0.74  |
| Kunming   | SWC    | 2.13     | 0.79   | 2.34      | 1.24    | 0.57 | 0.51 | 0.21  |
| Yinchuan  | NWC    | 1.76     | 0.56   | 2.75      | 1.36    | 0.38 | 0.30 | 0.99  |
| Xining    | NWC    | 1.16     | 0.43   | 3.07      | 1.40    | 0.22 | 0.16 | 1.91  |



**Table S8.** The location information of the 30 major cities used for air pollutants evaluation. NE is northeast China, NC is north China, CC is central China, EC is east China, SC is south China, SW indicates southwest China, and NW is northwest China.

| City         | Lon    | Lat   | Region | City      | Lon    | Lat   | Region |
|--------------|--------|-------|--------|-----------|--------|-------|--------|
| Haerbin      | 126.65 | 45.74 | NEC    | Shanghai  | 121.45 | 31.21 | EC     |
| Changchun    | 125.35 | 43.83 | NEC    | Hangzhou  | 120.08 | 30.21 | EC     |
| Shenyang     | 123.44 | 41.81 | NEC    | Xiamen    | 118.12 | 24.56 | EC     |
| Huhehaote    | 111.67 | 40.80 | NC     | Shenzhen  | 114.16 | 22.60 | SC     |
| Beijing      | 116.40 | 40.05 | NC     | Guangzhou | 113.35 | 23.19 | SC     |
| Tianjin      | 117.32 | 39.10 | NC     | Nanning   | 108.32 | 22.80 | SC     |
| Shijiazhuang | 114.50 | 38.03 | NC     | Haikou    | 110.37 | 20.01 | SC     |
| Taiyuan      | 112.52 | 37.86 | NC     | Chengdu   | 104.01 | 30.70 | SWC    |
| Zhengzhou    | 113.65 | 34.78 | NC     | Chongqing | 106.51 | 29.58 | SWC    |
| Jinan        | 116.98 | 36.65 | NC     | Guiyang   | 106.70 | 26.54 | SWC    |
| Wuhan        | 114.25 | 30.54 | CC     | Kunming   | 102.71 | 25.01 | SWC    |
| Changsha     | 112.98 | 28.21 | CC     | Yinchuan  | 106.16 | 38.49 | NWC    |
| Nanchang     | 115.88 | 28.68 | CC     | Xining    | 101.71 | 36.65 | NWC    |
| Nanjing      | 118.78 | 32.06 | EC     | Lanzhou   | 103.83 | 36.05 | NWC    |
| Hefei        | 117.25 | 31.85 | EC     | Xi'an     | 108.99 | 34.30 | NWC    |

**Table S9.** Evaluation results of O<sub>3</sub> (ppb) in 30 major cities from the implemented model. NE is northeast China, NC is north China, CC is central China, EC is east China, SC is south China, SW indicates southwest China, and NW is northwest China. Mean\_obs (Mean\_simu) is the mean value of observations (model simulations); SD\_obs (SD\_simu) is the standard deviation of the observations (model simulations); IOA is the index of agreement; CORR is the correlation coefficient; MB is the mean bias.

| City         | Region | Mean_obs | SD_obs | Mean_simu | SD_simu | IOA  | CORR | MB    |
|--------------|--------|----------|--------|-----------|---------|------|------|-------|
| Haerbin      | NEC    | 29.51    | 10.84  | 39.21     | 15.89   | 0.74 | 0.79 | 9.55  |
| Changchun    | NEC    | 34.68    | 12.49  | 44.40     | 16.93   | 0.74 | 0.71 | 9.68  |
| Shenyang     | NEC    | 38.75    | 12.22  | 49.02     | 17.44   | 0.67 | 0.60 | 9.90  |
| Huhehaote    | NC     | 39.58    | 9.67   | 52.91     | 22.26   | 0.61 | 0.74 | 13.64 |
| Beijing      | NC     | 45.09    | 14.61  | 82.16     | 36.92   | 0.43 | 0.64 | 37.12 |
| Tianjin      | NC     | 39.67    | 12.58  | 75.41     | 31.98   | 0.41 | 0.60 | 35.80 |
| Shijiazhuang | NC     | 35.73    | 11.50  | 76.13     | 30.20   | 0.30 | 0.32 | 40.69 |
| Taiyuan      | NC     | 35.40    | 11.95  | 68.05     | 24.95   | 0.43 | 0.64 | 32.94 |
| Zhengzhou    | NC     | 40.81    | 11.23  | 79.43     | 24.14   | 0.37 | 0.55 | 38.68 |
| Jinan        | NC     | 47.42    | 15.00  | 73.47     | 26.57   | 0.54 | 0.63 | 25.88 |
| Wuhan        | CC     | 35.06    | 10.98  | 42.43     | 17.23   | 0.69 | 0.62 | 7.55  |
| Changsha     | CC     | 29.44    | 9.47   | 52.40     | 16.10   | 0.46 | 0.60 | 23.11 |
| Nanchang     | CC     | 31.45    | 10.33  | 52.61     | 16.47   | 0.50 | 0.61 | 21.44 |
| Nanjing      | EC     | 35.75    | 14.83  | 44.73     | 20.58   | 0.70 | 0.60 | 8.80  |
| Hefei        | EC     | 30.82    | 9.29   | 53.69     | 21.92   | 0.45 | 0.58 | 22.56 |
| Shanghai     | EC     | 40.14    | 13.60  | 42.34     | 21.29   | 0.77 | 0.68 | 2.84  |
| Hangzhou     | EC     | 33.10    | 12.70  | 47.11     | 20.55   | 0.62 | 0.60 | 14.09 |
| Xiamen       | EC     | 23.23    | 7.11   | 22.73     | 13.34   | 0.72 | 0.73 | -0.24 |
| Shenzhen     | SC     | 21.30    | 8.80   | 26.83     | 15.68   | 0.74 | 0.75 | 5.59  |
| Guangzhou    | SC     | 23.96    | 11.55  | 34.46     | 16.80   | 0.67 | 0.62 | 10.75 |
| Nanning      | SC     | 21.83    | 7.09   | 36.10     | 9.84    | 0.49 | 0.60 | 14.38 |
| Haikou       | SC     | 17.94    | 5.44   | 38.29     | 11.70   | 0.33 | 0.58 | 20.77 |
| Chengdu      | SWC    | 34.47    | 10.49  | 52.48     | 15.95   | 0.48 | 0.44 | 18.06 |
| Chongqing    | SWC    | 28.04    | 10.66  | 50.50     | 17.74   | 0.47 | 0.54 | 22.59 |
| Guiyang      | SWC    | 23.37    | 7.03   | 36.74     | 11.15   | 0.50 | 0.56 | 13.67 |
| Kunming      | SWC    | 23.07    | 9.41   | 29.63     | 10.41   | 0.71 | 0.65 | 6.93  |
| Yinchuan     | NWC    | 37.98    | 9.77   | 45.79     | 16.26   | 0.60 | 0.51 | 7.95  |
| Xining       | NWC    | 33.67    | 8.04   | 46.29     | 12.31   | 0.48 | 0.39 | 12.64 |
| Lanzhou      | NWC    | 31.07    | 7.24   | 45.01     | 10.69   | 0.43 | 0.33 | 14.03 |
| Xi'an        | NWC    | 35.83    | 9.89   | 62.31     | 15.65   | 0.41 | 0.50 | 26.64 |

**Table S10.** Same for Table S9 but for PM<sub>2.5</sub> ( $\mu\text{g m}^{-3}$ ).

| City         | Region | Mean_obs | SD_obs | Mean_simu | SD_simu | IOA  | CORR  | MB    |
|--------------|--------|----------|--------|-----------|---------|------|-------|-------|
| Haerbin      | NEC    | 27.61    | 15.73  | 29.64     | 15.56   | 0.61 | 0.46  | 1.88  |
| Changchun    | NEC    | 32.25    | 17.12  | 41.62     | 18.63   | 0.60 | 0.50  | 9.10  |
| Shenyang     | NEC    | 36.64    | 15.79  | 48.46     | 19.35   | 0.59 | 0.46  | 11.51 |
| Huhehaote    | NC     | 24.72    | 12.70  | 33.57     | 14.00   | 0.69 | 0.60  | 9.15  |
| Beijing      | NC     | 57.32    | 34.04  | 63.16     | 33.56   | 0.76 | 0.62  | 6.60  |
| Tianjin      | NC     | 52.70    | 21.88  | 69.74     | 26.38   | 0.60 | 0.47  | 17.29 |
| Shijiazhuang | NC     | 63.17    | 30.31  | 79.08     | 31.86   | 0.63 | 0.51  | 16.88 |
| Taiyuan      | NC     | 45.38    | 20.08  | 57.07     | 22.46   | 0.65 | 0.50  | 12.35 |
| Zhengzhou    | NC     | 53.70    | 20.01  | 75.15     | 28.17   | 0.51 | 0.40  | 22.22 |
| Jinan        | NC     | 59.41    | 21.22  | 71.71     | 27.65   | 0.57 | 0.39  | 12.82 |
| Wuhan        | CC     | 39.00    | 18.66  | 119.54    | 51.38   | 0.23 | 0.23  | 79.72 |
| Changsha     | CC     | 38.17    | 19.58  | 71.13     | 36.26   | 0.32 | 0.17  | 33.01 |
| Nanchang     | CC     | 26.53    | 14.82  | 52.86     | 26.55   | 0.30 | 0.06  | 26.68 |
| Nanjing      | EC     | 39.60    | 21.41  | 97.02     | 42.29   | 0.37 | 0.40  | 56.94 |
| Hefei        | EC     | 45.70    | 22.23  | 88.54     | 37.62   | 0.36 | 0.25  | 42.70 |
| Shanghai     | EC     | 37.60    | 20.15  | 53.74     | 36.41   | 0.67 | 0.65  | 16.56 |
| Hangzhou     | EC     | 36.80    | 15.73  | 78.62     | 37.11   | 0.34 | 0.33  | 42.22 |
| Xiamen       | EC     | 20.31    | 9.07   | 33.12     | 15.13   | 0.54 | 0.58  | 13.29 |
| Shenzhen     | SC     | 17.55    | 10.23  | 23.79     | 16.02   | 0.72 | 0.67  | 6.48  |
| Guangzhou    | SC     | 28.37    | 12.04  | 39.84     | 16.85   | 0.55 | 0.43  | 11.94 |
| Nanning      | SC     | 23.58    | 12.48  | 23.19     | 15.26   | 0.55 | 0.31  | -0.01 |
| Haikou       | SC     | 12.89    | 5.09   | 12.51     | 7.12    | 0.73 | 0.60  | -0.10 |
| Chengdu      | SWC    | 38.90    | 17.04  | 81.81     | 23.00   | 0.35 | 0.25  | 43.26 |
| Chongqing    | SWC    | 35.57    | 11.67  | 99.64     | 55.52   | 0.17 | 0.10  | 64.97 |
| Guiyang      | SWC    | 24.73    | 11.45  | 46.55     | 24.40   | 0.40 | 0.37  | 22.00 |
| Kunming      | SWC    | 20.58    | 7.95   | 43.50     | 16.38   | 0.27 | 0.09  | 23.50 |
| Yinchuan     | NWC    | 37.58    | 12.57  | 36.18     | 10.60   | 0.52 | 0.26  | -1.07 |
| Xining       | NWC    | 34.43    | 9.97   | 35.40     | 7.83    | 0.43 | 0.10  | 1.01  |
| Lanzhou      | NWC    | 40.08    | 11.20  | 38.44     | 10.74   | 0.42 | 0.10  | -1.67 |
| Xi'an        | NWC    | 37.54    | 14.21  | 51.39     | 22.44   | 0.29 | -0.06 | 14.56 |

**Table S11.** Same for Table S9 but for PM<sub>10</sub> (μg m<sup>-3</sup>).

| City         | Region | Mean_obs | SD_obs | Mean_simu | SD_simu | IOA  | CORR  | MB     |
|--------------|--------|----------|--------|-----------|---------|------|-------|--------|
| Haerbin      | NEC    | 49.97    | 22.28  | 33.43     | 16.39   | 0.48 | 0.23  | -16.69 |
| Changchun    | NEC    | 64.85    | 26.37  | 46.96     | 20.01   | 0.57 | 0.37  | -18.17 |
| Shenyang     | NEC    | 65.87    | 24.76  | 55.69     | 21.29   | 0.58 | 0.37  | -10.48 |
| Huhehaote    | NC     | 73.91    | 34.15  | 35.23     | 14.74   | 0.48 | 0.32  | -38.35 |
| Beijing      | NC     | 77.62    | 34.51  | 69.73     | 35.62   | 0.66 | 0.47  | -12.22 |
| Tianjin      | NC     | 86.85    | 29.80  | 77.05     | 27.91   | 0.57 | 0.32  | -9.62  |
| Shijiazhuang | NC     | 112.95   | 43.39  | 89.21     | 33.36   | 0.57 | 0.38  | -22.72 |
| Taiyuan      | NC     | 92.85    | 33.83  | 64.29     | 24.10   | 0.53 | 0.33  | -27.86 |
| Zhengzhou    | NC     | 106.03   | 38.35  | 85.01     | 29.74   | 0.53 | 0.25  | -20.24 |
| Jinan        | NC     | 109.76   | 36.25  | 79.76     | 28.80   | 0.50 | 0.24  | -29.46 |
| Wuhan        | CC     | 75.09    | 33.90  | 146.68    | 55.86   | 0.32 | 0.10  | 70.72  |
| Changsha     | CC     | 60.95    | 25.17  | 78.86     | 37.25   | 0.35 | 0.02  | 17.95  |
| Nanchang     | CC     | 58.92    | 27.94  | 59.00     | 27.19   | 0.32 | -0.11 | 0.49   |
| Nanjing      | EC     | 67.36    | 31.43  | 110.38    | 44.53   | 0.43 | 0.24  | 42.44  |
| Hefei        | EC     | 75.26    | 32.05  | 101.85    | 39.47   | 0.38 | 0.07  | 26.55  |
| Shanghai     | EC     | 53.28    | 24.10  | 61.88     | 39.24   | 0.65 | 0.51  | 6.67   |
| Hangzhou     | EC     | 58.97    | 23.13  | 89.18     | 38.61   | 0.41 | 0.23  | 30.61  |
| Xiamen       | EC     | 38.16    | 15.05  | 41.73     | 16.40   | 0.64 | 0.46  | 4.01   |
| Shenzhen     | SC     | 33.21    | 14.04  | 31.00     | 17.64   | 0.75 | 0.63  | -1.92  |
| Guangzhou    | SC     | 46.43    | 15.72  | 49.09     | 17.91   | 0.59 | 0.36  | 3.18   |
| Nanning      | SC     | 47.81    | 22.05  | 25.27     | 15.88   | 0.43 | 0.20  | -22.20 |
| Haikou       | SC     | 28.74    | 8.36   | 14.45     | 7.43    | 0.48 | 0.47  | -13.99 |
| Chengdu      | SWC    | 67.66    | 28.12  | 95.59     | 24.48   | 0.45 | 0.22  | 28.31  |
| Chongqing    | SWC    | 60.32    | 18.46  | 116.20    | 59.89   | 0.19 | -0.11 | 56.90  |
| Guiyang      | SWC    | 46.40    | 18.07  | 50.72     | 25.52   | 0.49 | 0.22  | 4.50   |
| Kunming      | SWC    | 42.19    | 15.16  | 48.03     | 17.26   | 0.36 | 0.03  | 6.45   |
| Yinchuan     | NWC    | 85.20    | 29.22  | 39.92     | 11.06   | 0.41 | 0.01  | -45.23 |
| Xining       | NWC    | 71.24    | 28.07  | 41.86     | 8.21    | 0.36 | -0.14 | -29.35 |
| Lanzhou      | NWC    | 92.69    | 31.45  | 41.43     | 10.99   | 0.39 | -0.03 | -51.28 |
| Xi'an        | NWC    | 82.08    | 29.32  | 58.34     | 23.75   | 0.26 | -0.26 | -23.00 |

**Table S12.** Same for Table S9 but for SO<sub>2</sub> (ppb).

| City         | Region | Mean_obs | SD_obs | Mean_simu | SD_simu | IOA  | CORR  | MB    |
|--------------|--------|----------|--------|-----------|---------|------|-------|-------|
| Haerbin      | NEC    | 2.89     | 0.83   | 2.73      | 1.47    | 0.49 | 0.30  | -0.14 |
| Changchun    | NEC    | 2.90     | 0.90   | 4.33      | 2.51    | 0.41 | 0.42  | 1.49  |
| Shenyang     | NEC    | 5.78     | 2.50   | 7.75      | 4.32    | 0.55 | 0.43  | 2.04  |
| Huhehaote    | NC     | 4.91     | 1.78   | 1.77      | 1.52    | 0.47 | 0.48  | -3.12 |
| Beijing      | NC     | 1.67     | 1.16   | 6.31      | 3.60    | 0.30 | 0.47  | 4.67  |
| Tianjin      | NC     | 4.42     | 2.14   | 9.50      | 4.23    | 0.34 | 0.26  | 5.05  |
| Shijiazhuang | NC     | 7.04     | 3.53   | 11.95     | 3.79    | 0.53 | 0.49  | 4.99  |
| Taiyuan      | NC     | 8.48     | 4.01   | 8.85      | 4.72    | 0.69 | 0.53  | 0.47  |
| Zhengzhou    | NC     | 4.73     | 2.45   | 7.77      | 3.14    | 0.60 | 0.58  | 3.04  |
| Jinan        | NC     | 9.86     | 3.58   | 10.07     | 4.09    | 0.60 | 0.55  | 0.21  |
| Wuhan        | CC     | 4.11     | 1.18   | 38.60     | 12.06   | 0.05 | 0.06  | 34.57 |
| Changsha     | CC     | 5.08     | 1.52   | 4.53      | 2.72    | 0.66 | 0.59  | -0.49 |
| Nanchang     | CC     | 6.97     | 2.61   | 2.67      | 1.74    | 0.54 | 0.57  | -4.24 |
| Nanjing      | EC     | 5.16     | 2.00   | 8.62      | 3.74    | 0.52 | 0.60  | 3.37  |
| Hefei        | EC     | 3.98     | 1.15   | 4.71      | 2.14    | 0.47 | 0.46  | 0.70  |
| Shanghai     | EC     | 3.85     | 1.07   | 11.19     | 5.15    | 0.22 | 0.57  | 7.39  |
| Hangzhou     | EC     | 3.51     | 1.04   | 6.35      | 2.25    | 0.36 | 0.41  | 2.86  |
| Xiamen       | EC     | 4.28     | 1.63   | 5.83      | 1.95    | 0.53 | 0.48  | 1.60  |
| Shenzhen     | SC     | 2.75     | 0.59   | 5.98      | 2.39    | 0.27 | 0.65  | 3.27  |
| Guangzhou    | SC     | 4.42     | 1.12   | 7.17      | 2.75    | 0.32 | 0.25  | 2.75  |
| Nanning      | SC     | 3.41     | 0.78   | 0.89      | 0.66    | 0.31 | 0.65  | -2.54 |
| Haikou       | SC     | 1.99     | 0.48   | 1.86      | 0.67    | 0.62 | 0.45  | -0.11 |
| Chengdu      | SWC    | 4.36     | 1.35   | 16.35     | 4.69    | 0.14 | 0.16  | 12.09 |
| Chongqing    | SWC    | 4.01     | 1.28   | 37.89     | 13.02   | 0.04 | -0.27 | 34.19 |
| Guiyang      | SWC    | 2.75     | 0.90   | 2.91      | 1.33    | 0.54 | 0.47  | 0.15  |
| Kunming      | SWC    | 5.46     | 2.41   | 2.35      | 0.91    | 0.46 | 0.31  | -3.11 |
| Yinchuan     | NWC    | 6.90     | 2.92   | 5.27      | 1.56    | 0.56 | 0.39  | -1.63 |
| Xining       | NWC    | 7.87     | 3.92   | 2.76      | 0.76    | 0.46 | 0.32  | -5.10 |
| Lanzhou      | NWC    | 4.57     | 1.78   | 2.49      | 0.89    | 0.49 | 0.32  | -2.07 |
| Xi'an        | NWC    | 3.47     | 1.20   | 6.31      | 2.35    | 0.36 | 0.34  | 2.88  |

**Table S13.** Same for Table S9 but for NO<sub>2</sub> (ppb).

| City         | Region | Mean_obs | SD_obs | Mean_simu | SD_simu | IOA  | CORR  | MB     |
|--------------|--------|----------|--------|-----------|---------|------|-------|--------|
| Haerbin      | NEC    | 16.92    | 4.48   | 10.94     | 3.53    | 0.43 | 0.15  | -5.96  |
| Changchun    | NEC    | 18.41    | 5.53   | 12.63     | 4.60    | 0.45 | 0.17  | -5.79  |
| Shenyang     | NEC    | 16.73    | 4.59   | 16.94     | 7.15    | 0.44 | 0.13  | 0.26   |
| Huhehaote    | NC     | 16.33    | 4.03   | 2.70      | 1.20    | 0.32 | 0.34  | -13.63 |
| Beijing      | NC     | 17.90    | 4.04   | 12.59     | 4.77    | 0.53 | 0.40  | -5.31  |
| Tianjin      | NC     | 16.38    | 5.15   | 18.89     | 8.21    | 0.45 | 0.19  | 2.42   |
| Shijiazhuang | NC     | 16.75    | 5.60   | 20.20     | 4.44    | 0.54 | 0.32  | 3.51   |
| Taiyuan      | NC     | 18.93    | 4.63   | 9.35      | 3.54    | 0.43 | 0.39  | -9.53  |
| Zhengzhou    | NC     | 19.77    | 5.79   | 15.91     | 4.40    | 0.63 | 0.48  | -3.87  |
| Jinan        | NC     | 17.34    | 4.93   | 15.39     | 3.03    | 0.48 | 0.20  | -1.88  |
| Wuhan        | CC     | 18.09    | 5.34   | 45.34     | 10.56   | 0.26 | 0.45  | 27.24  |
| Changsha     | CC     | 12.96    | 3.18   | 11.29     | 4.38    | 0.45 | 0.16  | -1.64  |
| Nanchang     | CC     | 12.14    | 3.39   | 8.19      | 4.08    | 0.43 | 0.17  | -3.85  |
| Nanjing      | EC     | 17.26    | 4.45   | 35.08     | 8.33    | 0.28 | 0.35  | 17.56  |
| Hefei        | EC     | 14.25    | 3.69   | 23.09     | 5.28    | 0.32 | 0.10  | 8.77   |
| Shanghai     | EC     | 15.76    | 5.58   | 22.91     | 10.62   | 0.60 | 0.67  | 7.36   |
| Hangzhou     | EC     | 16.27    | 4.13   | 30.89     | 6.75    | 0.33 | 0.50  | 14.71  |
| Xiamen       | EC     | 12.44    | 4.09   | 20.29     | 4.24    | 0.48 | 0.52  | 7.94   |
| Shenzhen     | SC     | 13.60    | 3.88   | 18.61     | 6.48    | 0.64 | 0.72  | 5.10   |
| Guangzhou    | SC     | 18.14    | 4.60   | 24.73     | 7.64    | 0.32 | -0.06 | 6.63   |
| Nanning      | SC     | 12.58    | 3.32   | 3.71      | 1.10    | 0.35 | 0.34  | -8.91  |
| Haikou       | SC     | 7.47     | 2.04   | 4.23      | 1.28    | 0.54 | 0.67  | -3.19  |
| Chengdu      | SWC    | 22.64    | 6.07   | 32.26     | 6.48    | 0.45 | 0.32  | 9.73   |
| Chongqing    | SWC    | 16.85    | 3.88   | 25.82     | 7.15    | 0.28 | 0.00  | 9.16   |
| Guiyang      | SWC    | 12.21    | 3.00   | 6.38      | 2.25    | 0.42 | 0.30  | -5.87  |
| Kunming      | SWC    | 12.73    | 2.92   | 10.85     | 2.46    | 0.41 | 0.08  | -1.91  |
| Yinchuan     | NWC    | 13.66    | 4.29   | 8.66      | 1.90    | 0.49 | 0.29  | -4.97  |
| Xining       | NWC    | 15.84    | 4.23   | 8.96      | 1.50    | 0.39 | 0.16  | -6.89  |
| Lanzhou      | NWC    | 21.33    | 6.37   | 6.24      | 1.75    | 0.39 | 0.34  | -15.10 |
| Xi'an        | NWC    | 18.34    | 4.91   | 12.63     | 2.96    | 0.44 | 0.06  | -5.66  |

**Table S14.** Same for Table S9 but for CO (ppm).

| City         | Region | Mean_obs | SD_obs | Mean_simu | SD_simu | IOA  | CORR | MB    |
|--------------|--------|----------|--------|-----------|---------|------|------|-------|
| Haerbin      | NEC    | 0.60     | 0.13   | 0.32      | 0.09    | 0.42 | 0.49 | -0.28 |
| Changchun    | NEC    | 0.61     | 0.13   | 0.37      | 0.1     | 0.49 | 0.57 | -0.24 |
| Shenyang     | NEC    | 0.65     | 0.20   | 0.44      | 0.12    | 0.58 | 0.59 | -0.21 |
| Huhehaote    | NC     | 0.65     | 0.16   | 0.22      | 0.07    | 0.35 | 0.46 | -0.43 |
| Beijing      | NC     | 0.67     | 0.22   | 0.52      | 0.18    | 0.68 | 0.58 | -0.15 |
| Tianjin      | NC     | 0.88     | 0.25   | 0.56      | 0.18    | 0.50 | 0.36 | -0.32 |
| Shijiazhuang | NC     | 0.66     | 0.20   | 0.67      | 0.16    | 0.61 | 0.41 | 0.01  |
| Taiyuan      | NC     | 0.88     | 0.21   | 0.43      | 0.12    | 0.42 | 0.39 | -0.45 |
| Zhengzhou    | NC     | 0.92     | 0.18   | 0.54      | 0.12    | 0.43 | 0.48 | -0.38 |
| Jinan        | NC     | 0.84     | 0.21   | 0.50      | 107.33  | 0.44 | 0.28 | -0.34 |
| Wuhan        | CC     | 0.69     | 0.16   | 0.86      | 185.96  | 0.44 | 0.19 | 0.17  |
| Changsha     | CC     | 0.62     | 0.12   | 0.49      | 115.36  | 0.62 | 0.59 | -0.13 |
| Nanchang     | CC     | 0.76     | 0.14   | 0.40      | 100.50  | 0.35 | 0.23 | -0.36 |
| Nanjing      | EC     | 0.68     | 0.15   | 0.68      | 159.70  | 0.70 | 0.54 | 0.00  |
| Hefei        | EC     | 0.67     | 0.15   | 0.55      | 118.06  | 0.61 | 0.47 | -0.12 |
| Shanghai     | EC     | 0.57     | 0.13   | 0.46      | 201.93  | 0.72 | 0.76 | -0.11 |
| Hangzhou     | EC     | 0.61     | 0.11   | 0.57      | 127.97  | 0.70 | 0.54 | -0.04 |
| Xiamen       | EC     | 0.40     | 0.10   | 0.36      | 68.35   | 0.69 | 0.63 | -0.04 |
| Shenzhen     | SC     | 0.62     | 0.09   | 0.34      | 109.18  | 0.37 | 0.62 | -0.28 |
| Guangzhou    | SC     | 0.66     | 0.10   | 0.47      | 96.83   | 0.42 | 0.28 | -0.19 |
| Nanning      | SC     | 0.66     | 0.09   | 0.26      | 67.07   | 0.27 | 0.37 | -0.4  |
| Haikou       | SC     | 0.46     | 0.09   | 0.23      | 63.76   | 0.38 | 0.40 | -0.23 |
| Chengdu      | SWC    | 0.73     | 0.14   | 0.63      | 97.18   | 0.51 | 0.21 | -0.1  |
| Chongqing    | SWC    | 0.70     | 0.11   | 0.59      | 163.36  | 0.53 | 0.36 | -0.11 |
| Guiyang      | SWC    | 0.49     | 0.10   | 0.36      | 106.94  | 0.58 | 0.56 | -0.13 |
| Kunming      | SWC    | 0.64     | 0.12   | 0.32      | 48.26   | 0.35 | 0.27 | -0.32 |
| Yinchuan     | NWC    | 0.70     | 0.22   | 0.22      | 46.61   | 0.37 | 0.07 | -0.48 |
| Xining       | NWC    | 0.79     | 0.18   | 0.22      | 30.69   | 0.31 | 0.18 | -0.57 |
| Lanzhou      | NWC    | 0.75     | 0.17   | 0.21      | 39.52   | 0.31 | 0.11 | -0.54 |
| Xi'an        | NWC    | 0.88     | 0.14   | 0.41      | 87.75   | 0.32 | 0.40 | -0.47 |

**Table S15.** Summary of previous studies about O<sub>3</sub> damage effect.

| <b>Study Domain</b> | <b>Simulation Period</b>              | <b>Model</b>            | <b>Results</b>                                                                                                                                           | <b>References</b>            |
|---------------------|---------------------------------------|-------------------------|----------------------------------------------------------------------------------------------------------------------------------------------------------|------------------------------|
| The Whole Globe     | 2002–2009                             | CLM4.5SP<br>(offline)   | GPP (-): 8–12%<br>TR (-): 2–2.4%                                                                                                                         | Lombardozzi et al.<br>(2015) |
|                     | 2000–2020 JJA                         | CESM v1.2.2<br>(online) | LAI (-): less than 5%<br>TR (-): 6.4%<br>T <sub>2</sub> (+): up to 2.0 °C<br>O <sub>3</sub> (+): 4–6 ppb                                                 | Sadiq et al. (2017)          |
|                     | 2000–2022                             | CESM v1.1.1             | LH (-): larger than 4%<br>T <sub>2</sub> (+): up to 1.5 °C                                                                                               | Arnold et al. (2018)         |
|                     | 20 years                              | NASA<br>ModelE2-YIBs    | O <sub>3</sub> (+): 2.1 ppb (Eastern China),<br>1.6 ppb (Eastern U.S.),<br>1.3 ppb (Western Europe)                                                      | Gong et al. (2020)           |
| The United States   | 1998–2007                             | YIBs                    | GPP (-): 11–17%                                                                                                                                          | Yue and Unger, 2014          |
|                     | 2007–2012<br>May 1 to<br>September 30 | WRF-Chem v3.7.1         | LH (-): 10–27 W m <sup>-2</sup><br>T <sub>2</sub> (+): 0.6–2.0 °C<br>Rainfall (-): 0.9–1.4 mm d <sup>-1</sup><br>Runoff (-): 0.1–0.17 mm d <sup>-1</sup> | Li et al. (2016)             |
|                     | 2009–2014<br>June-September           | WRF-Chem v3.9           | LH (-): 9–11 W m <sup>-2</sup><br>T <sub>2</sub> (+): 0.6–0.7 °C<br>Rainfall (-): 0.15–0.21 mm d <sup>-1</sup><br>GPP (-): 30–38%                        | Li et al. (2018)             |
| India               | 2005                                  | WRF-Chem v3.2.2         | Crop Yield (-): 2.1–5.3%                                                                                                                                 | Ghude et al. (2014)          |
| China               | 2010                                  | NASA ModelE2-<br>YIBs   | NPP (-): 14%                                                                                                                                             | Yue et al. (2017)            |
|                     | Oct 2012–Dec<br>2013                  | RegCM-CHEM4-<br>YIBs    | GPP (-): 12.1 ± 4.4% (up to<br>35% in summer)                                                                                                            | Xie et al. (2019)            |

Note: “+” means increase, “-” means decrease
