# Supplementary material for: Effects of ozone-vegetation interactions on meteorology and air quality in China using a two-way coupled land-atmosphere model
Source: Copernicus journal article supplement (doi:10.5194/acp-2021-165), 2021-03-18
Supplement: Supplementary file 2 [file acp-2021-165-supplement.pdf]

1 Supplement of

2

3 **Effects of O<sub>3</sub>-vegetation interactions on meteorology and air quality**  
4 **in China using a two-way coupled land-atmosphere model**

5

6 **Table S1.** Physics options used in model simulations

| <b>Atmospheric process</b> | <b>Scheme</b>                 |
|----------------------------|-------------------------------|
| Cloud microphysics         | Morrison double-moment scheme |
| Cumulus parameterization   | Grell-3D scheme               |
| Longwave radiation         | RRTMG scheme                  |
| Shortwave radiation        | Goddard scheme                |
| Land-surface physics       | Noah-MP land surface model    |
| Planetary boundary layer   | Mellor-Yamada-Janjic scheme   |

7

8 **Table S2.** The location information of the major cities used for meteorology evaluation. NE is  
9 northeastern China, NC is northern China, CC is central China, EC is eastern China, SC is southern  
10 China, SW indicates southwestern China, and NW is northwestern China.

| <b>City</b> | <b>Lon</b> | <b>Lat</b> | <b>Region</b> | <b>City</b> | <b>Lon</b> | <b>Lat</b> | <b>Region</b> |
|-------------|------------|------------|---------------|-------------|------------|------------|---------------|
| Haerbin     | 126.34     | 45.56      | NE            | Shanghai    | 121.27     | 31.24      | EC            |
| Changchun   | 125.13     | 43.54      | NE            | Hangzhou    | 120.10     | 30.14      | EC            |
| Shenyang    | 123.31     | 41.44      | NE            | Nanchang    | 115.55     | 28.36      | EC            |
| Huhehaote   | 111.34     | 40.51      | NC            | Xiamen      | 118.04     | 24.29      | EC            |
| Beijing     | 116.13     | 39.99      | NC            | Shenzhen    | 114.00     | 23.32      | SC            |
| Tianjin     | 117.21     | 39.17      | NC            | Guangzhou   | 113.29     | 23.13      | SC            |
| Taiyuan     | 112.35     | 37.37      | NC            | Nanning     | 108.13     | 22.38      | SC            |
| Zhengzhou   | 113.39     | 34.43      | CC            | Haikou      | 110.15     | 20.00      | SC            |
| Wuhan       | 114.03     | 30.36      | CC            | Chongqing   | 107.22     | 29.53      | SW            |
| Changsha    | 112.55     | 28.13      | CC            | Guiyang     | 106.44     | 26.35      | SW            |
| Jinan       | 117.00     | 36.36      | EC            | Kunming     | 102.39     | 25.00      | SW            |
| Nanjing     | 118.54     | 31.56      | EC            | Yinchuan    | 106.12     | 38.28      | NW            |
| Hefei       | 117.18     | 31.47      | EC            | Xining      | 101.45     | 36.44      | NW            |

11 **Table S3.** Evaluation results of surface temperature at 2 m ( $T_{2m}$ ) in 26 major cities. NE is northeastern  
 12 China, NC is northern China, CC is central China, EC is eastern China, SC is southern China, SW  
 13 indicates southwestern China, and NW is northwestern China. Mean\_obs (Mean\_simu) is the mean value  
 14 of observation (model simulation); SD\_obs (SD\_simu) is the standard deviation of the observation  
 15 (model simulation); IOA is the index of agreement; CORR is the correlation coefficient; MB is the mean  
 16 bias.

| City      | Region | Mean_obs | SD_obs | Mean_simu | SD_simu | IOA  | CORR | MB    |
|-----------|--------|----------|--------|-----------|---------|------|------|-------|
| Haerbin   | NE     | 22.58    | 3.16   | 22.19     | 3.21    | 0.94 | 0.91 | -0.39 |
| Changchun | NE     | 22.62    | 3.22   | 22.05     | 3.00    | 0.94 | 0.93 | -0.57 |
| Shenyang  | NE     | 23.84    | 2.79   | 23.95     | 2.84    | 0.94 | 0.89 | 0.11  |
| Huhehaote | NC     | 21.26    | 2.88   | 23.52     | 3.04    | 0.81 | 0.88 | 2.27  |
| Beijing   | NC     | 26.54    | 2.59   | 28.25     | 2.80    | 0.83 | 0.86 | 1.71  |
| Tianjin   | NC     | 26.54    | 2.52   | 27.41     | 2.73    | 0.90 | 0.87 | 0.87  |
| Taiyuan   | NC     | 21.25    | 2.88   | 23.52     | 3.04    | 0.81 | 0.88 | 2.27  |
| Zhengzhou | CC     | 27.57    | 2.89   | 26.66     | 2.79    | 0.92 | 0.91 | -1.01 |
| Wuhan     | CC     | 27.30    | 2.98   | 26.53     | 2.55    | 0.93 | 0.90 | -0.76 |
| Changsha  | CC     | 27.25    | 3.08   | 26.65     | 2.87    | 0.92 | 0.89 | -0.60 |
| Jinan     | EC     | 26.49    | 2.81   | 25.65     | 2.65    | 0.90 | 0.87 | -0.84 |
| Nanjing   | EC     | 26.76    | 3.29   | 26.32     | 3.00    | 0.96 | 0.93 | -0.44 |
| Hefei     | EC     | 27.14    | 3.20   | 26.38     | 2.86    | 0.94 | 0.93 | -0.76 |
| Shanghai  | EC     | 27.09    | 3.32   | 25.93     | 2.82    | 0.93 | 0.94 | -1.16 |
| Hangzhou  | EC     | 27.60    | 3.38   | 26.26     | 3.00    | 0.91 | 0.91 | -1.35 |
| Nanchang  | EC     | 28.30    | 3.08   | 27.42     | 2.82    | 0.9  | 0.85 | -0.88 |
| Xiamen    | EC     | 28.04    | 1.75   | 27.40     | 1.22    | 0.77 | 0.72 | -0.63 |
| Shenzhen  | SC     | 29.03    | 1.39   | 28.65     | 0.86    | 0.65 | 0.53 | -0.39 |
| Guangzhou | SC     | 28.29    | 1.55   | 28.85     | 1.55    | 0.75 | 0.65 | 0.56  |
| Nanning   | SC     | 28.14    | 1.63   | 27.67     | 1.74    | 0.82 | 0.72 | -0.47 |
| Haikou    | SC     | 28.93    | 1.38   | 29.25     | 1.06    | 0.77 | 0.66 | 0.31  |
| Chongqing | SW     | 26.69    | 3.24   | 24.84     | 2.79    | 0.83 | 0.87 | -1.84 |
| Guiyang   | SW     | 22.43    | 2.15   | 21.37     | 2.00    | 0.82 | 0.79 | -1.06 |
| Kunming   | SW     | 20.49    | 1.57   | 18.63     | 1.64    | 0.65 | 0.75 | -1.86 |
| Yinchuan  | NW     | 23.49    | 2.97   | 24.64     | 3.15    | 0.93 | 0.93 | 1.15  |

|                |    |              |             |              |             |             |             |              |
|----------------|----|--------------|-------------|--------------|-------------|-------------|-------------|--------------|
| Xining         | NW | 16.9         | 2.77        | 12.46        | 2.87        | 0.60        | 0.85        | -4.44        |
| <b>Average</b> |    | <b>25.87</b> | <b>2.79</b> | <b>25.02</b> | <b>2.57</b> | <b>0.85</b> | <b>0.85</b> | <b>-0.84</b> |

17

18

19

**Table S4.** Same for Table S3 but for relative humidity at 2 m (RH<sub>2m</sub>).

| City      | Region | Mean_obs | SD_obs | Mean_simu | SD_simu | IOA  | CORR | MB     |
|-----------|--------|----------|--------|-----------|---------|------|------|--------|
| Haerbin   | NE     | 72.25    | 10.52  | 70.32     | 15.31   | 0.86 | 0.81 | -1.78  |
| Changchun | NE     | 69.78    | 12.27  | 74.89     | 13.57   | 0.82 | 0.78 | 5.10   |
| Shenyang  | NE     | 71.26    | 11.68  | 70.73     | 13.02   | 0.86 | 0.77 | -0.53  |
| Huhehaote | NC     | 50.52    | 14.24  | 49.89     | 13.02   | 0.79 | 0.70 | -0.63  |
| Beijing   | NC     | 62.17    | 14.69  | 48.05     | 13.58   | 0.71 | 0.77 | -14.12 |
| Tianjin   | NC     | 66.37    | 13.25  | 55.75     | 12.44   | 0.75 | 0.77 | -10.62 |
| Taiyuan   | NC     | 66.72    | 12.98  | 57.38     | 15.03   | 0.76 | 0.73 | -9.3   |
| Zhengzhou | CC     | 67.24    | 14.00  | 63.76     | 15.27   | 0.83 | 0.72 | -3.48  |
| Wuhan     | CC     | 81.20    | 8.84   | 85.88     | 9.27    | 0.76 | 0.68 | 4.68   |
| Changsha  | CC     | 79.40    | 10.74  | 90.57     | 7.12    | 0.64 | 0.67 | 11.17  |
| Jinan     | EC     | 66.49    | 14.48  | 67.22     | 15.19   | 0.88 | 0.79 | 0.74   |
| Nanjing   | EC     | 78.51    | 10.83  | 87.07     | 9.82    | 0.77 | 0.83 | 8.56   |
| Hefei     | EC     | 79.55    | 9.68   | 85.79     | 11.06   | 0.82 | 0.82 | 6.26   |
| Shanghai  | EC     | 76.98    | 9.55   | 89.14     | 8.31    | 0.63 | 0.73 | 12.16  |
| Hangzhou  | EC     | 76.52    | 10.88  | 90.33     | 7.49    | 0.63 | 0.85 | 13.81  |
| Nanchang  | EC     | 77.08    | 10.76  | 88.42     | 9.43    | 0.70 | 0.79 | 11.34  |
| Xiamen    | EC     | 83.09    | 9.00   | 91.65     | 4.89    | 0.62 | 0.72 | 8.56   |
| Shenzhen  | SC     | 79.82    | 7.54   | 92.03     | 3.77    | 0.50 | 0.62 | 12.21  |
| Guangzhou | SC     | 82.05    | 6.78   | 87.39     | 7.48    | 0.68 | 0.61 | 5.34   |
| Nanning   | SC     | 83.01    | 5.89   | 90.25     | 6.37    | 0.62 | 0.63 | 7.23   |
| Haikou    | SC     | 80.17    | 5.94   | 83.95     | 5.03    | 0.66 | 0.55 | 3.78   |
| Chongqing | SW     | 76.28    | 11.00  | 88.16     | 7.34    | 0.63 | 0.70 | 11.86  |
| Guiyang   | SW     | 82.46    | 8.64   | 95.04     | 3.84    | 0.52 | 0.65 | 12.57  |
| Kunming   | SW     | 78.03    | 7.70   | 93.82     | 4.21    | 0.42 | 0.57 | 15.79  |
| Yinchuan  | NW     | 52.63    | 14.01  | 42.99     | 13.70   | 0.77 | 0.76 | -9.65  |
| Xining    | NW     | 63.22    | 12.66  | 73.97     | 14.49   | 0.72 | 0.75 | 10.75  |

|                |  |              |              |              |             |             |             |             |
|----------------|--|--------------|--------------|--------------|-------------|-------------|-------------|-------------|
| <b>Average</b> |  | <b>73.87</b> | <b>10.86</b> | <b>80.25</b> | <b>9.36</b> | <b>0.69</b> | <b>0.72</b> | <b>6.38</b> |
|----------------|--|--------------|--------------|--------------|-------------|-------------|-------------|-------------|

20

21

22

**Table S5.** Same for Table S3 but for wind speed at 10 m ( $WS_{10m}$ ).

| <b>City</b>    | <b>Region</b> | <b>Mean_obs</b> | <b>SD_obs</b> | <b>Mean_simu</b> | <b>SD_simu</b> | <b>IOA</b>  | <b>CORR</b> | <b>MB</b>   |
|----------------|---------------|-----------------|---------------|------------------|----------------|-------------|-------------|-------------|
| Haerbin        | NE            | 2.47            | 1.16          | 3.08             | 1.78           | 0.75        | 0.68        | 0.62        |
| Changchun      | NE            | 2.30            | 0.89          | 3.16             | 1.91           | 0.61        | 0.64        | 0.86        |
| Shenyang       | NE            | 1.88            | 0.74          | 3.00             | 1.72           | 0.50        | 0.53        | 1.12        |
| Huhehaote      | NC            | 2.76            | 0.88          | 2.46             | 1.30           | 0.57        | 0.41        | -0.30       |
| Beijing        | NC            | 1.81            | 0.59          | 2.20             | 1.35           | 0.52        | 0.43        | 0.38        |
| Tianjin        | NC            | 2.09            | 0.70          | 2.59             | 1.27           | 0.58        | 0.47        | 0.49        |
| Taiyuan        | NC            | 2.06            | 0.81          | 2.12             | 1.12           | 0.66        | 0.46        | 0.07        |
| Zhengzhou      | CC            | 1.75            | 0.54          | 2.46             | 1.26           | 0.48        | 0.48        | 0.71        |
| Wuhan          | CC            | 1.79            | 0.75          | 2.02             | 1.25           | 0.63        | 0.50        | 0.23        |
| Changsha       | CC            | 2.15            | 0.93          | 2.58             | 1.47           | 0.65        | 0.55        | 0.45        |
| Jinan          | EC            | 1.89            | 0.81          | 2.84             | 1.44           | 0.61        | 0.60        | 0.95        |
| Nanjing        | EC            | 2.31            | 0.96          | 2.68             | 1.41           | 0.72        | 0.62        | 0.36        |
| Hefei          | EC            | 1.91            | 0.66          | 2.67             | 1.40           | 0.61        | 0.63        | 0.76        |
| Shanghai       | EC            | 2.36            | 0.86          | 3.32             | 1.84           | 0.57        | 0.54        | 0.97        |
| Hangzhou       | EC            | 2.04            | 0.61          | 2.45             | 1.46           | 0.53        | 0.47        | 0.41        |
| Nanchang       | EC            | 2.23            | 0.76          | 2.55             | 1.50           | 0.55        | 0.48        | 0.31        |
| Xiamen         | EC            | 2.29            | 0.73          | 3.12             | 1.58           | 0.54        | 0.49        | 0.83        |
| Shenzhen       | SC            | 1.93            | 0.91          | 3.27             | 1.74           | 0.47        | 0.39        | 1.35        |
| Guangzhou      | SC            | 1.92            | 0.81          | 2.38             | 1.23           | 0.59        | 0.44        | 0.45        |
| Nanning        | SC            | 2.11            | 0.72          | 2.75             | 1.48           | 0.56        | 0.51        | 0.64        |
| Haikou         | SC            | 2.11            | 0.58          | 2.85             | 1.57           | 0.45        | 0.39        | 0.74        |
| Chongqing      | SW            | 1.92            | 0.68          | 2.09             | 1.24           | 0.55        | 0.44        | 0.17        |
| Guiyang        | SW            | 2.44            | 0.81          | 3.18             | 1.71           | 0.59        | 0.57        | 0.74        |
| Kunming        | SW            | 2.13            | 0.79          | 2.34             | 1.24           | 0.57        | 0.51        | 0.21        |
| Yinchuan       | NW            | 1.76            | 0.56          | 2.75             | 1.36           | 0.38        | 0.30        | 0.99        |
| Xining         | NW            | 1.16            | 0.43          | 3.07             | 1.40           | 0.22        | 0.16        | 1.91        |
| <b>Average</b> |               | <b>2.02</b>     | <b>0.74</b>   | <b>2.52</b>      | <b>1.40</b>    | <b>0.55</b> | <b>0.47</b> | <b>0.50</b> |

23 **Table S6.** The location information of the major cities used for air pollutants evaluation. NE is  
 24 northeastern China, NC is northern China, CC is central China, EC is eastern China, SC is southern  
 25 China, SW indicates southwestern China, and NW is northwestern China

| City         | Lon    | Lat   | Region | City      | Lon    | Lat   | Region |
|--------------|--------|-------|--------|-----------|--------|-------|--------|
| Haerbin      | 126.65 | 45.74 | NE     | Hangzhou  | 120.08 | 30.21 | EC     |
| Changchun    | 125.35 | 43.83 | NE     | Nanchang  | 115.88 | 28.68 | EC     |
| Shenyang     | 123.44 | 41.81 | NE     | Xiamen    | 118.12 | 24.56 | EC     |
| Huhehaote    | 111.67 | 40.80 | NC     | Shenzhen  | 114.16 | 22.60 | SC     |
| Beijing      | 116.40 | 40.05 | NC     | Guangzhou | 113.35 | 23.19 | SC     |
| Tianjin      | 117.32 | 39.10 | NC     | Nanning   | 108.32 | 22.80 | SC     |
| Shijiazhuang | 114.50 | 38.03 | NC     | Haikou    | 110.37 | 20.01 | SC     |
| Taiyuan      | 112.52 | 37.86 | NC     | Chengdu   | 104.01 | 30.70 | SW     |
| Zhengzhou    | 113.65 | 34.78 | CC     | Chongqing | 106.51 | 29.58 | SW     |
| Wuhan        | 114.25 | 30.54 | CC     | Guiyang   | 106.70 | 26.54 | SW     |
| Changsha     | 112.98 | 28.21 | CC     | Kunming   | 102.71 | 25.01 | SW     |
| Jinan        | 116.98 | 36.65 | EC     | Yinchuan  | 106.16 | 38.49 | NW     |
| Nanjing      | 118.78 | 32.06 | EC     | Xining    | 101.71 | 36.65 | NW     |
| Hefei        | 117.25 | 31.85 | EC     | Lanzhou   | 103.83 | 36.05 | NW     |
| Shanghai     | 121.45 | 31.21 | EC     | Xi'an     | 108.99 | 34.30 | NW     |

26  
 27  
 28  
 29  
 30  
 31  
 32  
 33  
 34  
 35  
 36  
 37  
 38

39 **Table S7.** Evaluation results of O<sub>3</sub> concentration in 30 major cities. NE is northeastern China, NC is  
 40 northern China, CC is central China, EC is eastern China, SC is southern China, SW indicates  
 41 southwestern China, and NW is northwestern China. Mean\_obs (Mean\_simu) is the mean value of  
 42 observation (model simulation); SD\_obs (SD\_simu) is the standard deviation of the observation (model  
 43 simulation); IOA is the index of agreement; CORR is the correlation coefficient; MB is the mean bias.

| City         | Region | Mean_obs | SD_obs | Mean_simu | SD_simu | IOA  | CORR | MB    |
|--------------|--------|----------|--------|-----------|---------|------|------|-------|
| Haerbin      | NE     | 29.51    | 10.84  | 39.21     | 15.89   | 0.74 | 0.79 | 9.55  |
| Changchun    | NE     | 34.68    | 12.49  | 44.40     | 16.93   | 0.74 | 0.71 | 9.68  |
| Shenyang     | NE     | 38.75    | 12.22  | 49.02     | 17.44   | 0.67 | 0.60 | 9.90  |
| Huhehaote    | NC     | 39.58    | 9.67   | 52.91     | 22.26   | 0.61 | 0.74 | 13.64 |
| Beijing      | NC     | 45.09    | 14.61  | 82.16     | 36.92   | 0.43 | 0.64 | 37.12 |
| Tianjin      | NC     | 39.67    | 12.58  | 75.41     | 31.98   | 0.41 | 0.60 | 35.80 |
| Shijiazhuang | NC     | 35.73    | 11.50  | 76.13     | 30.20   | 0.30 | 0.32 | 40.69 |
| Taiyuan      | NC     | 35.40    | 11.95  | 68.05     | 24.95   | 0.43 | 0.64 | 32.94 |
| Zhengzhou    | CC     | 40.81    | 11.23  | 79.43     | 24.14   | 0.37 | 0.55 | 38.68 |
| Wuhan        | CC     | 35.06    | 10.98  | 42.43     | 17.23   | 0.69 | 0.62 | 7.55  |
| Changsha     | CC     | 29.44    | 9.47   | 52.40     | 16.10   | 0.46 | 0.60 | 23.11 |
| Jinan        | EC     | 47.42    | 15.00  | 73.47     | 26.57   | 0.54 | 0.63 | 25.88 |
| Nanjing      | EC     | 35.75    | 14.83  | 44.73     | 20.58   | 0.70 | 0.60 | 8.80  |
| Hefei        | EC     | 30.82    | 9.29   | 53.69     | 21.92   | 0.45 | 0.58 | 22.56 |
| Shanghai     | EC     | 40.14    | 13.60  | 42.34     | 21.29   | 0.77 | 0.68 | 2.84  |
| Hangzhou     | EC     | 33.10    | 12.70  | 47.11     | 20.55   | 0.62 | 0.60 | 14.09 |
| Nanchang     | EC     | 31.45    | 10.33  | 52.61     | 16.47   | 0.50 | 0.61 | 21.44 |
| Xiamen       | EC     | 23.23    | 7.11   | 22.73     | 13.34   | 0.72 | 0.73 | -0.24 |
| Shenzhen     | SC     | 21.30    | 8.80   | 26.83     | 15.68   | 0.74 | 0.75 | 5.59  |
| Guangzhou    | SC     | 23.96    | 11.55  | 34.46     | 16.80   | 0.67 | 0.62 | 10.75 |
| Nanning      | SC     | 21.83    | 7.09   | 36.10     | 9.84    | 0.49 | 0.60 | 14.38 |
| Haikou       | SC     | 17.94    | 5.44   | 38.29     | 11.70   | 0.33 | 0.58 | 20.77 |
| Chengdu      | SW     | 34.47    | 10.49  | 52.48     | 15.95   | 0.48 | 0.44 | 18.06 |
| Chongqing    | SW     | 28.04    | 10.66  | 50.50     | 17.74   | 0.47 | 0.54 | 22.59 |
| Guiyang      | SW     | 23.37    | 7.03   | 36.74     | 11.15   | 0.50 | 0.56 | 13.67 |
| Kunming      | SW     | 23.07    | 9.41   | 29.63     | 10.41   | 0.71 | 0.65 | 6.93  |

|                |    |       |       |       |       |      |      |       |
|----------------|----|-------|-------|-------|-------|------|------|-------|
| Yinchuan       | NW | 37.98 | 9.77  | 45.79 | 16.26 | 0.60 | 0.51 | 7.95  |
| Xining         | NW | 33.67 | 8.04  | 46.29 | 12.31 | 0.48 | 0.39 | 12.64 |
| Lanzhou        | NW | 31.07 | 7.24  | 45.01 | 10.69 | 0.43 | 0.33 | 14.03 |
| Xi'an          | NW | 35.83 | 9.89  | 62.31 | 15.65 | 0.41 | 0.50 | 26.64 |
| <b>Average</b> |    | 32.71 | 10.60 | 49.61 | 18.66 | 0.55 | 0.59 | 17.01 |

44

45 **Table S8.** Same for Table S7 but for PM<sub>2.5</sub> concentration.

| City         | Region | Mean_obs | SD_obs | Mean_simu | SD_simu | IOA  | CORR | MB    |
|--------------|--------|----------|--------|-----------|---------|------|------|-------|
| Haerbin      | NE     | 27.61    | 15.73  | 29.64     | 15.56   | 0.61 | 0.46 | 1.88  |
| Changchun    | NE     | 32.25    | 17.12  | 41.62     | 18.63   | 0.60 | 0.50 | 9.10  |
| Shenyang     | NE     | 36.64    | 15.79  | 48.46     | 19.35   | 0.59 | 0.46 | 11.51 |
| Huhehaote    | NC     | 24.72    | 12.70  | 33.57     | 14.00   | 0.69 | 0.60 | 9.15  |
| Beijing      | NC     | 57.32    | 34.04  | 63.16     | 33.56   | 0.76 | 0.62 | 6.60  |
| Tianjin      | NC     | 52.70    | 21.88  | 69.74     | 26.38   | 0.60 | 0.47 | 17.29 |
| Shijiazhuang | NC     | 63.17    | 30.31  | 79.08     | 31.86   | 0.63 | 0.51 | 16.88 |
| Taiyuan      | NC     | 45.38    | 20.08  | 57.07     | 22.46   | 0.65 | 0.50 | 12.35 |
| Zhengzhou    | CC     | 53.70    | 20.01  | 75.15     | 28.17   | 0.51 | 0.40 | 22.22 |
| Wuhan        | CC     | 39.00    | 18.66  | 119.54    | 51.38   | 0.23 | 0.23 | 79.72 |
| Changsha     | CC     | 38.17    | 19.58  | 71.13     | 36.26   | 0.32 | 0.17 | 33.01 |
| Jinan        | EC     | 59.41    | 21.22  | 71.71     | 27.65   | 0.57 | 0.39 | 12.82 |
| Nanjing      | EC     | 39.60    | 21.41  | 97.02     | 42.29   | 0.37 | 0.40 | 56.94 |
| Hefei        | EC     | 45.70    | 22.23  | 88.54     | 37.62   | 0.36 | 0.25 | 42.70 |
| Shanghai     | EC     | 37.60    | 20.15  | 53.74     | 36.41   | 0.67 | 0.65 | 16.56 |
| Hangzhou     | EC     | 36.80    | 15.73  | 78.62     | 37.11   | 0.34 | 0.33 | 42.22 |
| Nanchang     | EC     | 26.53    | 14.82  | 52.86     | 26.55   | 0.30 | 0.06 | 26.68 |
| Xiamen       | EC     | 20.31    | 9.07   | 33.12     | 15.13   | 0.54 | 0.58 | 13.29 |
| Shenzhen     | SC     | 17.55    | 10.23  | 23.79     | 16.02   | 0.72 | 0.67 | 6.48  |
| Guangzhou    | SC     | 28.37    | 12.04  | 39.84     | 16.85   | 0.55 | 0.43 | 11.94 |
| Nanning      | SC     | 23.58    | 12.48  | 23.19     | 15.26   | 0.55 | 0.31 | -0.01 |
| Haikou       | SC     | 12.89    | 5.09   | 12.51     | 7.12    | 0.73 | 0.60 | -0.10 |
| Chengdu      | SW     | 38.90    | 17.04  | 81.81     | 23.00   | 0.35 | 0.25 | 43.26 |
| Chongqing    | SW     | 35.57    | 11.67  | 99.64     | 55.52   | 0.17 | 0.10 | 64.97 |

|                |    |       |       |       |       |      |       |       |
|----------------|----|-------|-------|-------|-------|------|-------|-------|
| Guiyang        | SW | 24.73 | 11.45 | 46.55 | 24.40 | 0.40 | 0.37  | 22.00 |
| Kunming        | SW | 20.58 | 7.95  | 43.50 | 16.38 | 0.27 | 0.09  | 23.50 |
| Yinchuan       | NW | 37.58 | 12.57 | 36.18 | 10.60 | 0.52 | 0.26  | -1.07 |
| Xining         | NW | 34.43 | 9.97  | 35.40 | 7.83  | 0.43 | 0.10  | 1.01  |
| Lanzhou        | NW | 40.08 | 11.20 | 38.44 | 10.74 | 0.42 | 0.10  | -1.67 |
| Xi'an          | NW | 37.54 | 14.21 | 51.39 | 22.44 | 0.29 | -0.06 | 14.56 |
| <b>Average</b> |    | 36.38 | 16.25 | 57.97 | 25.85 | 0.48 | 0.36  | 21.87 |

46

47 **Table S9.** Same for Table S7 but for PM<sub>10</sub> concentration

| City         | Region | Mean_obs | SD_obs | Mean_simu | SD_simu | IOA  | CORR  | MB     |
|--------------|--------|----------|--------|-----------|---------|------|-------|--------|
| Haerbin      | NE     | 49.97    | 22.28  | 33.43     | 16.39   | 0.48 | 0.23  | -16.69 |
| Changchun    | NE     | 64.85    | 26.37  | 46.96     | 20.01   | 0.57 | 0.37  | -18.17 |
| Shenyang     | NE     | 65.87    | 24.76  | 55.69     | 21.29   | 0.58 | 0.37  | -10.48 |
| Huhehaote    | NC     | 73.91    | 34.15  | 35.23     | 14.74   | 0.48 | 0.32  | -38.35 |
| Beijing      | NC     | 77.62    | 34.51  | 69.73     | 35.62   | 0.66 | 0.47  | -12.22 |
| Tianjin      | NC     | 86.85    | 29.80  | 77.05     | 27.91   | 0.57 | 0.32  | -9.62  |
| Shijiazhuang | NC     | 112.95   | 43.39  | 89.21     | 33.36   | 0.57 | 0.38  | -22.72 |
| Taiyuan      | NC     | 92.85    | 33.83  | 64.29     | 24.10   | 0.53 | 0.33  | -27.86 |
| Zhengzhou    | CC     | 106.03   | 38.35  | 85.01     | 29.74   | 0.53 | 0.25  | -20.24 |
| Wuhan        | CC     | 75.09    | 33.90  | 146.68    | 55.86   | 0.32 | 0.10  | 70.72  |
| Changsha     | CC     | 60.95    | 25.17  | 78.86     | 37.25   | 0.35 | 0.02  | 17.95  |
| Jinan        | EC     | 109.76   | 36.25  | 79.76     | 28.80   | 0.50 | 0.24  | -29.46 |
| Nanjing      | EC     | 67.36    | 31.43  | 110.38    | 44.53   | 0.43 | 0.24  | 42.44  |
| Hefei        | EC     | 75.26    | 32.05  | 101.85    | 39.47   | 0.38 | 0.07  | 26.55  |
| Shanghai     | EC     | 53.28    | 24.10  | 61.88     | 39.24   | 0.65 | 0.51  | 6.67   |
| Hangzhou     | EC     | 58.97    | 23.13  | 89.18     | 38.61   | 0.41 | 0.23  | 30.61  |
| Nanchang     | EC     | 58.92    | 27.94  | 59.00     | 27.19   | 0.32 | -0.11 | 0.49   |
| Xiamen       | EC     | 38.16    | 15.05  | 41.73     | 16.40   | 0.64 | 0.46  | 4.01   |
| Shenzhen     | SC     | 33.21    | 14.04  | 31.00     | 17.64   | 0.75 | 0.63  | -1.92  |
| Guangzhou    | SC     | 46.43    | 15.72  | 49.09     | 17.91   | 0.59 | 0.36  | 3.18   |
| Nanning      | SC     | 47.81    | 22.05  | 25.27     | 15.88   | 0.43 | 0.20  | -22.20 |
| Haikou       | SC     | 28.74    | 8.36   | 14.45     | 7.43    | 0.48 | 0.47  | -13.99 |

|                |    |              |              |              |              |             |             |              |
|----------------|----|--------------|--------------|--------------|--------------|-------------|-------------|--------------|
| Chengdu        | SW | 67.66        | 28.12        | 95.59        | 24.48        | 0.45        | 0.22        | 28.31        |
| Chongqing      | SW | 60.32        | 18.46        | 116.20       | 59.89        | 0.19        | -0.11       | 56.90        |
| Guiyang        | SW | 46.40        | 18.07        | 50.72        | 25.52        | 0.49        | 0.22        | 4.50         |
| Kunming        | SW | 42.19        | 15.16        | 48.03        | 17.26        | 0.36        | 0.03        | 6.45         |
| Yinchuan       | NW | 85.20        | 29.22        | 39.92        | 11.06        | 0.41        | 0.01        | -45.23       |
| Xining         | NW | 71.24        | 28.07        | 41.86        | 8.21         | 0.36        | -0.14       | -29.35       |
| Lanzhou        | NW | 92.69        | 31.45        | 41.43        | 10.99        | 0.39        | -0.03       | -51.28       |
| Xi'an          | NW | 82.08        | 29.32        | 58.34        | 23.75        | 0.26        | -0.26       | -23.00       |
| <b>Average</b> |    | <b>67.58</b> | <b>26.44</b> | <b>66.34</b> | <b>27.37</b> | <b>0.47</b> | <b>0.22</b> | <b>-1.21</b> |

48

49

50

**Table S10.** Same for Table S7 but for SO<sub>2</sub> concentration

| City         | Region | Mean_obs | SD_obs | Mean_simu | SD_simu | IOA  | CORR | MB    |
|--------------|--------|----------|--------|-----------|---------|------|------|-------|
| Haerbin      | NE     | 2.89     | 0.83   | 2.73      | 1.47    | 0.49 | 0.30 | -0.14 |
| Changchun    | NE     | 2.90     | 0.90   | 4.33      | 2.51    | 0.41 | 0.42 | 1.49  |
| Shenyang     | NE     | 5.78     | 2.50   | 7.75      | 4.32    | 0.55 | 0.43 | 2.04  |
| Huhehaote    | NC     | 4.91     | 1.78   | 1.77      | 1.52    | 0.47 | 0.48 | -3.12 |
| Beijing      | NC     | 1.67     | 1.16   | 6.31      | 3.60    | 0.30 | 0.47 | 4.67  |
| Tianjin      | NC     | 4.42     | 2.14   | 9.50      | 4.23    | 0.34 | 0.26 | 5.05  |
| Shijiazhuang | NC     | 7.04     | 3.53   | 11.95     | 3.79    | 0.53 | 0.49 | 4.99  |
| Taiyuan      | NC     | 8.48     | 4.01   | 8.85      | 4.72    | 0.69 | 0.53 | 0.47  |
| Zhengzhou    | CC     | 4.73     | 2.45   | 7.77      | 3.14    | 0.60 | 0.58 | 3.04  |
| Wuhan        | CC     | 4.11     | 1.18   | 38.60     | 12.06   | 0.05 | 0.06 | 34.57 |
| Changsha     | CC     | 5.08     | 1.52   | 4.53      | 2.72    | 0.66 | 0.59 | -0.49 |
| Jinan        | EC     | 9.86     | 3.58   | 10.07     | 4.09    | 0.60 | 0.55 | 0.21  |
| Nanjing      | EC     | 5.16     | 2.00   | 8.62      | 3.74    | 0.52 | 0.60 | 3.37  |
| Hefei        | EC     | 3.98     | 1.15   | 4.71      | 2.14    | 0.47 | 0.46 | 0.70  |
| Shanghai     | EC     | 3.85     | 1.07   | 11.19     | 5.15    | 0.22 | 0.57 | 7.39  |
| Hangzhou     | EC     | 3.51     | 1.04   | 6.35      | 2.25    | 0.36 | 0.41 | 2.86  |
| Nanchang     | EC     | 6.97     | 2.61   | 2.67      | 1.74    | 0.54 | 0.57 | -4.24 |
| Xiamen       | EC     | 4.28     | 1.63   | 5.83      | 1.95    | 0.53 | 0.48 | 1.60  |
| Shenzhen     | SC     | 2.75     | 0.59   | 5.98      | 2.39    | 0.27 | 0.65 | 3.27  |

|                |    |      |      |       |       |      |       |       |
|----------------|----|------|------|-------|-------|------|-------|-------|
| Guangzhou      | SC | 4.42 | 1.12 | 7.17  | 2.75  | 0.32 | 0.25  | 2.75  |
| Nanning        | SC | 3.41 | 0.78 | 0.89  | 0.66  | 0.31 | 0.65  | -2.54 |
| Haikou         | SC | 1.99 | 0.48 | 1.86  | 0.67  | 0.62 | 0.45  | -0.11 |
| Chengdu        | SW | 4.36 | 1.35 | 16.35 | 4.69  | 0.14 | 0.16  | 12.09 |
| Chongqing      | SW | 4.01 | 1.28 | 37.89 | 13.02 | 0.04 | -0.27 | 34.19 |
| Guiyang        | SW | 2.75 | 0.90 | 2.91  | 1.33  | 0.54 | 0.47  | 0.15  |
| Kunming        | SW | 5.46 | 2.41 | 2.35  | 0.91  | 0.46 | 0.31  | -3.11 |
| Yinchuan       | NW | 6.90 | 2.92 | 5.27  | 1.56  | 0.56 | 0.39  | -1.63 |
| Xining         | NW | 7.87 | 3.92 | 2.76  | 0.76  | 0.46 | 0.32  | -5.10 |
| Lanzhou        | NW | 4.57 | 1.78 | 2.49  | 0.89  | 0.49 | 0.32  | -2.07 |
| Xi'an          | NW | 3.47 | 1.20 | 6.31  | 2.35  | 0.36 | 0.34  | 2.88  |
| <b>Average</b> |    | 4.72 | 1.79 | 8.37  | 3.29  | 0.42 | 0.41  | 3.68  |

51

52

53

54

**Table S11.** Same for Table S7 but for NO<sub>2</sub> concentration

| City         | Region | Mean_obs | SD_obs | Mean_simu | SD_simu | IOA  | CORR | MB         |
|--------------|--------|----------|--------|-----------|---------|------|------|------------|
| Haerbin      | NE     | 16.92    | 4.48   | 10.94     | 3.53    | 0.43 | 0.15 | -5.96      |
| Changchun    | NE     | 18.41    | 5.53   | 12.63     | 4.60    | 0.45 | 0.17 | -5.79      |
| Shenyang     | NE     | 16.73    | 4.59   | 16.94     | 7.15    | 0.44 | 0.13 | 0.26       |
| Huhehaote    | NC     | 16.33    | 4.03   | 2.70      | 1.20    | 0.32 | 0.34 | -<br>13.63 |
| Beijing      | NC     | 17.90    | 4.04   | 12.59     | 4.77    | 0.53 | 0.40 | -5.31      |
| Tianjin      | NC     | 16.38    | 5.15   | 18.89     | 8.21    | 0.45 | 0.19 | 2.42       |
| Shijiazhuang | NC     | 16.75    | 5.60   | 20.20     | 4.44    | 0.54 | 0.32 | 3.51       |
| Taiyuan      | NC     | 18.93    | 4.63   | 9.35      | 3.54    | 0.43 | 0.39 | -9.53      |
| Zhengzhou    | CC     | 19.77    | 5.79   | 15.91     | 4.40    | 0.63 | 0.48 | -3.87      |
| Wuhan        | CC     | 18.09    | 5.34   | 45.34     | 10.56   | 0.26 | 0.45 | 27.24      |
| Changsha     | CC     | 12.96    | 3.18   | 11.29     | 4.38    | 0.45 | 0.16 | -1.64      |
| Jinan        | EC     | 17.34    | 4.93   | 15.39     | 3.03    | 0.48 | 0.20 | -1.88      |
| Nanjing      | EC     | 17.26    | 4.45   | 35.08     | 8.33    | 0.28 | 0.35 | 17.56      |
| Hefei        | EC     | 14.25    | 3.69   | 23.09     | 5.28    | 0.32 | 0.10 | 8.77       |

|                |    |              |             |              |             |             |             |             |
|----------------|----|--------------|-------------|--------------|-------------|-------------|-------------|-------------|
| Shanghai       | EC | 15.76        | 5.58        | 22.91        | 10.62       | 0.60        | 0.67        | 7.36        |
| Hangzhou       | EC | 16.27        | 4.13        | 30.89        | 6.75        | 0.33        | 0.50        | 14.71       |
| Nanchang       | EC | 12.14        | 3.39        | 8.19         | 4.08        | 0.43        | 0.17        | -3.85       |
| Xiamen         | EC | 12.44        | 4.09        | 20.29        | 4.24        | 0.48        | 0.52        | 7.94        |
| Shenzhen       | SC | 13.60        | 3.88        | 18.61        | 6.48        | 0.64        | 0.72        | 5.10        |
| Guangzhou      | SC | 18.14        | 4.60        | 24.73        | 7.64        | 0.32        | -0.06       | 6.63        |
| Nanning        | SC | 12.58        | 3.32        | 3.71         | 1.10        | 0.35        | 0.34        | -8.91       |
| Haikou         | SC | 7.47         | 2.04        | 4.23         | 1.28        | 0.54        | 0.67        | -3.19       |
| Chengdu        | SW | 22.64        | 6.07        | 32.26        | 6.48        | 0.45        | 0.32        | 9.73        |
| Chongqing      | SW | 16.85        | 3.88        | 25.82        | 7.15        | 0.28        | 0.00        | 9.16        |
| Guiyang        | SW | 12.21        | 3.00        | 6.38         | 2.25        | 0.42        | 0.30        | -5.87       |
| Kunming        | SW | 12.73        | 2.92        | 10.85        | 2.46        | 0.41        | 0.08        | -1.91       |
| Yinchuan       | NW | 13.66        | 4.29        | 8.66         | 1.90        | 0.49        | 0.29        | -4.97       |
| Xining         | NW | 15.84        | 4.23        | 8.96         | 1.50        | 0.39        | 0.16        | -6.89       |
| Lanzhou        | NW | 21.33        | 6.37        | 6.24         | 1.75        | 0.39        | 0.34        | -<br>15.10  |
| Xi'an          | NW | 18.34        | 4.91        | 12.63        | 2.96        | 0.44        | 0.06        | -5.66       |
| <b>Average</b> |    | <b>16.08</b> | <b>4.41</b> | <b>17.45</b> | <b>4.96</b> | <b>0.42</b> | <b>0.30</b> | <b>1.39</b> |

55

56

57 **Table S12.** Same for Table S3 but for CO concentration

| City         | Region | Mean_obs | SD_obs | Mean_simu | SD_simu | IOA  | CORR | MB      |
|--------------|--------|----------|--------|-----------|---------|------|------|---------|
| Haerbin      | NE     | 604.76   | 128.08 | 318.23    | 85.86   | 0.42 | 0.49 | -287.81 |
| Changchun    | NE     | 607.61   | 129.67 | 367.93    | 97.64   | 0.49 | 0.57 | -239.92 |
| Shenyang     | NE     | 652.10   | 206.92 | 443.19    | 120.09  | 0.58 | 0.59 | -209.41 |
| Huhehaote    | NC     | 650.10   | 159.32 | 216.99    | 65.73   | 0.35 | 0.46 | -432.03 |
| Beijing      | NC     | 669.52   | 222.85 | 516.17    | 181.88  | 0.68 | 0.58 | -150.27 |
| Tianjin      | NC     | 877.87   | 251.89 | 563.59    | 180.45  | 0.50 | 0.36 | -315.39 |
| Shijiazhuang | NC     | 661.22   | 202.62 | 670.87    | 155.67  | 0.61 | 0.41 | 12.88   |

|                |    |               |               |               |               |             |             |                |
|----------------|----|---------------|---------------|---------------|---------------|-------------|-------------|----------------|
| Taiyuan        | NC | 878.46        | 210.97        | 431.27        | 123.49        | 0.42        | 0.39        | -444.05        |
| Zhengzhou      | CC | 916.78        | 183.34        | 543.18        | 120.33        | 0.43        | 0.48        | -372.60        |
| Wuhan          | CC | 686.56        | 159.73        | 860.37        | 185.96        | 0.44        | 0.19        | 174.05         |
| Changsha       | CC | 620.73        | 119.95        | 492.53        | 115.36        | 0.62        | 0.59        | -125.66        |
| Jinan          | EC | 839.20        | 209.23        | 498.36        | 107.33        | 0.44        | 0.28        | -339.40        |
| Nanjing        | EC | 683.48        | 151.53        | 682.18        | 159.70        | 0.70        | 0.54        | -4.61          |
| Hefei          | EC | 668.11        | 152.90        | 552.05        | 118.06        | 0.61        | 0.47        | -116.28        |
| Shanghai       | EC | 566.49        | 133.34        | 463.19        | 201.93        | 0.72        | 0.76        | -100.36        |
| Hangzhou       | EC | 612.86        | 110.80        | 569.58        | 127.97        | 0.70        | 0.54        | -40.73         |
| Nanchang       | EC | 762.10        | 137.02        | 399.52        | 100.50        | 0.35        | 0.23        | -358.75        |
| Xiamen         | EC | 397.98        | 101.69        | 362.96        | 68.35         | 0.69        | 0.63        | -33.06         |
| Shenzhen       | SC | 623.00        | 87.86         | 335.10        | 109.18        | 0.37        | 0.62        | -286.51        |
| Guangzhou      | SC | 656.52        | 97.80         | 465.13        | 96.83         | 0.42        | 0.28        | -189.46        |
| Nanning        | SC | 655.01        | 91.87         | 256.69        | 67.07         | 0.27        | 0.37        | -396.97        |
| Haikou         | SC | 463.22        | 87.64         | 231.31        | 63.76         | 0.38        | 0.40        | -228.82        |
| Chengdu        | SW | 731.12        | 140.38        | 631.05        | 97.18         | 0.51        | 0.21        | -98.10         |
| Chongqing      | SW | 700.28        | 110.34        | 585.25        | 163.36        | 0.53        | 0.36        | -109.59        |
| Guiyang        | SW | 485.69        | 95.08         | 359.60        | 106.94        | 0.58        | 0.56        | -124.75        |
| Kunming        | SW | 637.47        | 119.32        | 320.97        | 48.26         | 0.35        | 0.27        | -315.67        |
| Yinchuan       | NW | 697.14        | 215.64        | 223.29        | 46.61         | 0.37        | 0.07        | -473.20        |
| Xining         | NW | 787.17        | 177.28        | 223.20        | 30.69         | 0.31        | 0.18        | -563.77        |
| Lanzhou        | NW | 753.03        | 171.71        | 214.66        | 39.52         | 0.31        | 0.11        | -538.13        |
| Xi'an          | NW | 884.64        | 141.49        | 409.88        | 87.75         | 0.32        | 0.40        | -472.05        |
| <b>Average</b> |    | <b>679.26</b> | <b>149.99</b> | <b>451.07</b> | <b>112.14</b> | <b>0.49</b> | <b>0.42</b> | <b>-226.83</b> |

58

59

60

61

62 **Table S13.** Summary of studies about O<sub>3</sub> damage effect.

| <b>Study Domain</b> | <b>Simulation Period</b>           | <b>Model</b>      | <b>Results</b>                                                                                                          | <b>References</b>         |
|---------------------|------------------------------------|-------------------|-------------------------------------------------------------------------------------------------------------------------|---------------------------|
| The Whole Globe     | 2002-2009                          | CLM4.5SP          | GPP (-): 8-12%<br>TR (-): 2-2.4%                                                                                        | Lombardozzi et al. (2015) |
|                     | 2000-2020<br>JJA                   | CESM v1.2.2       | LAI (-): 5%<br>TR (-): 6.4% globally<br>T <sub>2</sub> (+): up to 2.0<br>O <sub>3</sub> (+): 4-6ppbv                    | Sadiq et al. (2017)       |
|                     | 2000-2022                          | CESM v1.1.1       | LH (-): larger than 4%<br>T <sub>2</sub> (+): up to 1.5 K                                                               | Arnold et al. (2018)      |
|                     | 20 years                           | NASA ModelE2-YIBs | O <sub>3</sub> (+): 2.1ppbv (Eastern China), 1.6ppbv (Eastern U.S.), 1.3 ppbv (Western Europe)                          | Gong et al. (2020)        |
| The United States   | 1998-2007                          | YIBs              | GPP (-): 4-8%                                                                                                           | Yue et al. (2014)         |
|                     | 2007-2012<br>May 1 to September 30 | WRF-Chem v3.7.1   | LH (-): 10-27 W/m <sup>2</sup><br>T <sub>2</sub> (+): 0.6-2.0<br>Rainfall (-): 0.9-1.4 mm/d<br>Runoff (-): 0.1-0.17mm/d | Li et al. (2016)          |
|                     | 2009-2014<br>June-September        | WRF-Chem v3.9     | LH (-): 9-11 W/m <sup>2</sup><br>T <sub>2</sub> (+): 0.6-0.7<br>Rainfall (-): 0.15-0.21 mm/d<br>GPP (-): 30-38%         | Li et al. (2018)          |
| India               | 2005                               | WRF-Chem v3.2.2   | Crop Yield (-): 2.1-5.3%                                                                                                | Ghude et al. (2014)       |
| China               | 2010                               | NASA ModelE2-YIBs | NPP (-): 14%                                                                                                            | Yue et al. (2017)         |
|                     | Oct 2012- Dec 2013                 | RegCM-CHEM4-YIBs  | GPP (-): 12.1 ± 4.4% (35% in summer)                                                                                    | Xie et al. (2019)         |

63 Note: “+” means increase, “-” means decrease
